# Supplementary material
Source: PubMed Central journal article supplement (PMC7605509)

Sample File Panel

B02\_2018 fsa PowerPlex\_Fusion\_POP7\_

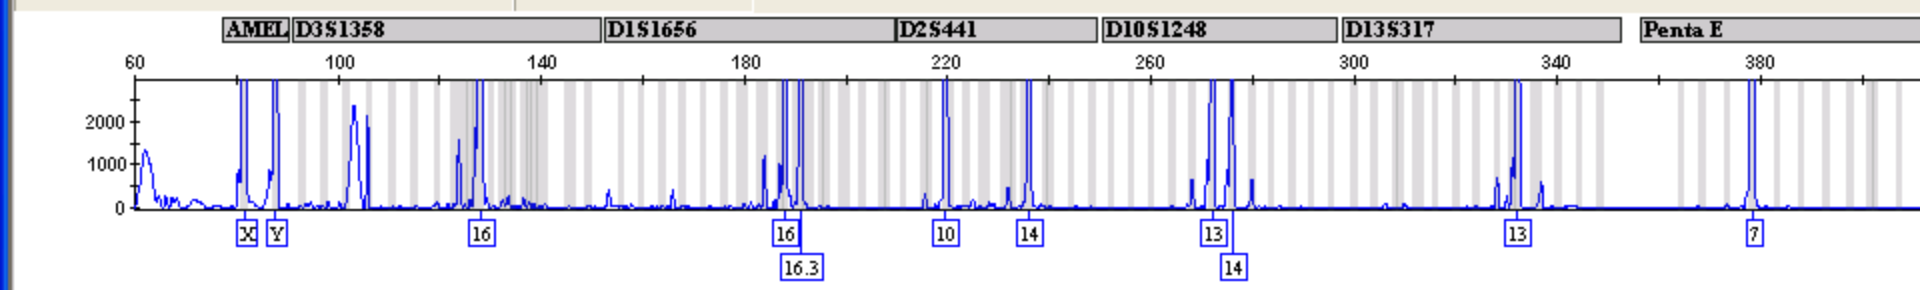

B02\_2018 fsa PowerPlex\_Fusion\_POP7\_

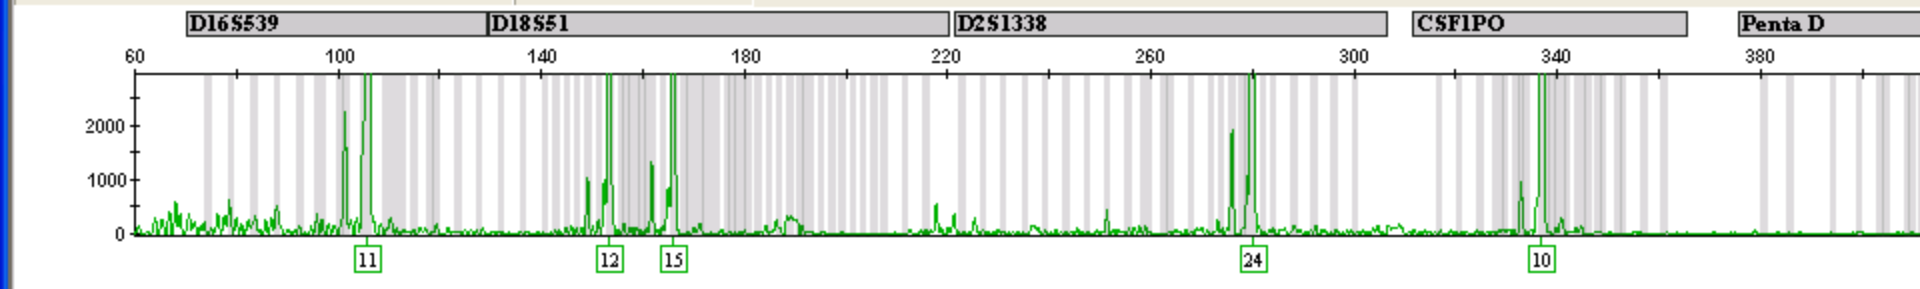

B02\_2018 fsa PowerPlex\_Fusion\_POP7\_

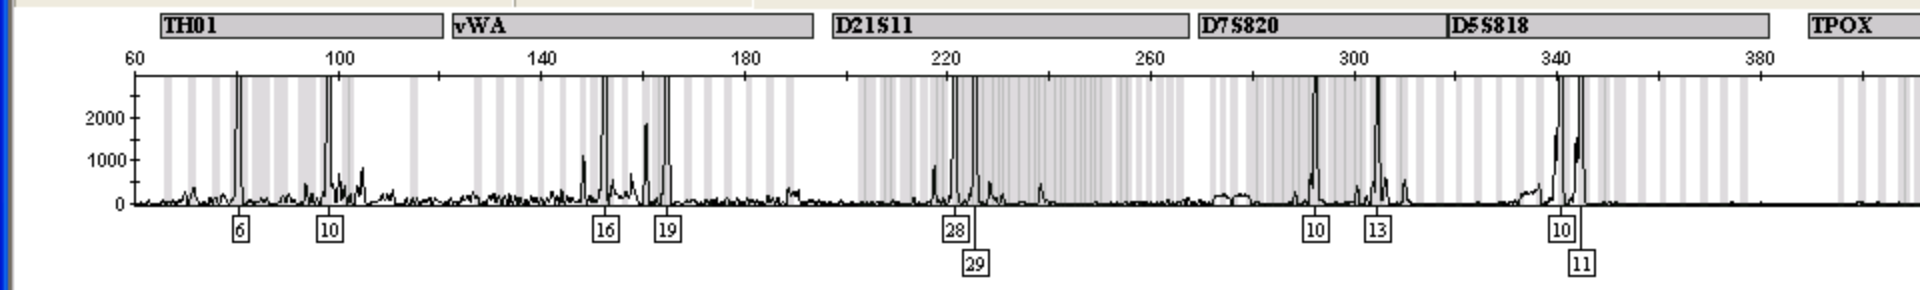

B02\_2018 fsa PowerPlex\_Fusion\_POP7\_

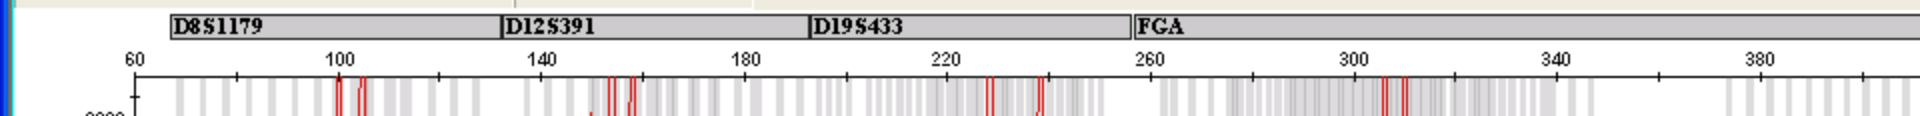

Sample File Panel

C02\_2019\_fsa PowerPlex\_Fusion\_POP7\_

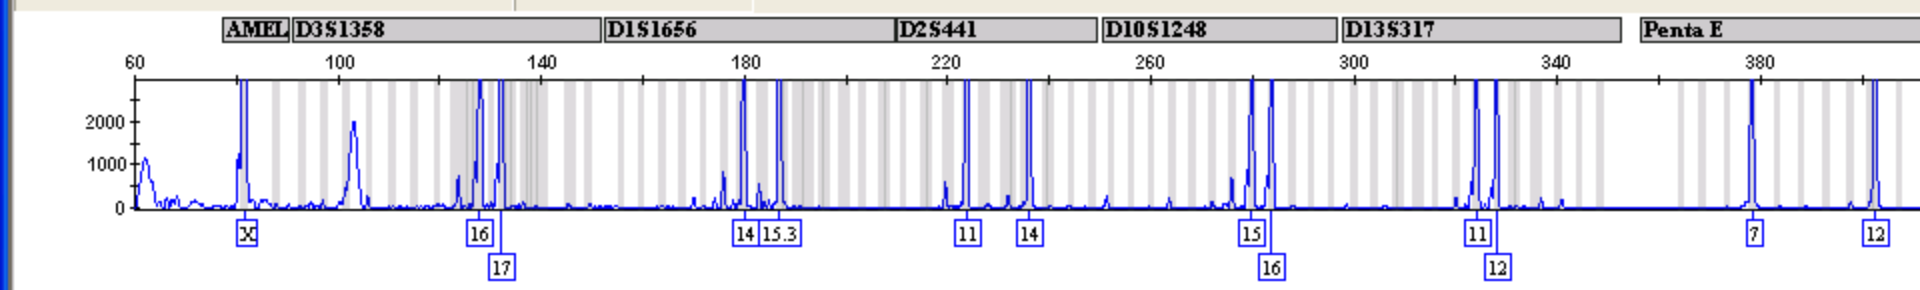

< [Progress bar]

C02\_2019\_fsa PowerPlex\_Fusion\_POP7\_

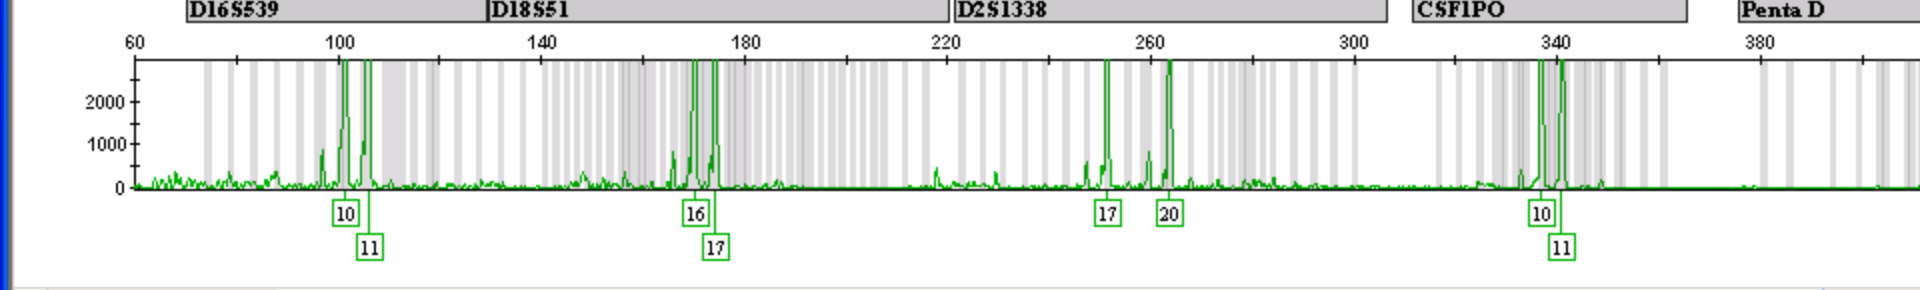

< [Progress bar]

C02\_2019\_fsa PowerPlex\_Fusion\_POP7\_

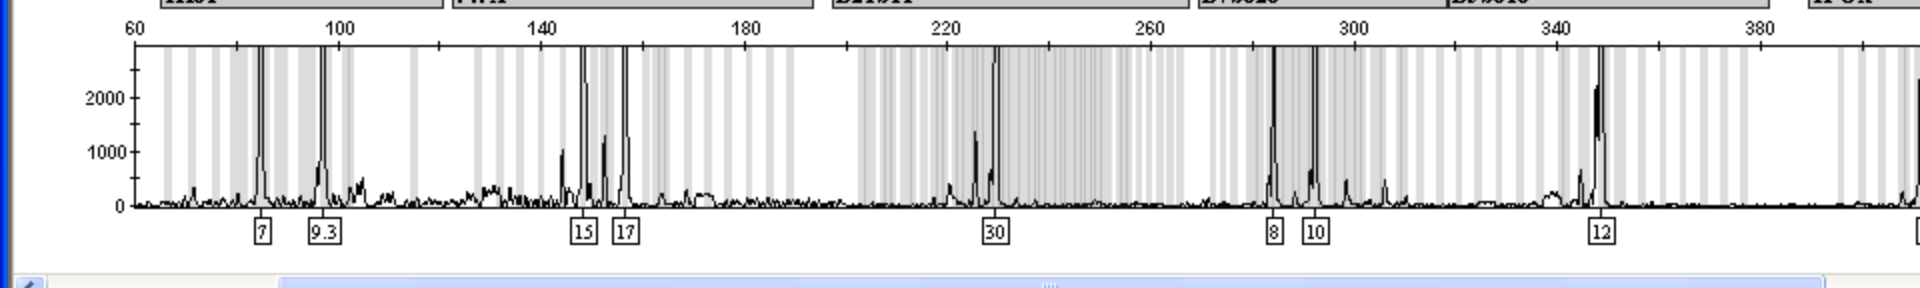

< [Progress bar]

C02\_2019\_fsa PowerPlex\_Fusion\_POP7\_

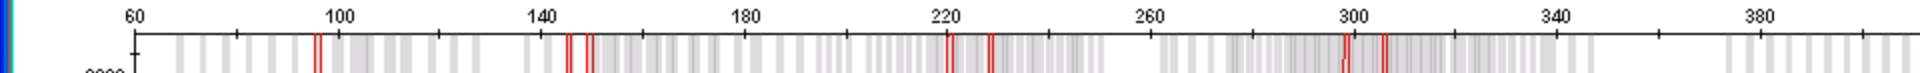

Sample File Panel

D02\_2020 fsa PowerPlex\_Fusion\_POP7\_

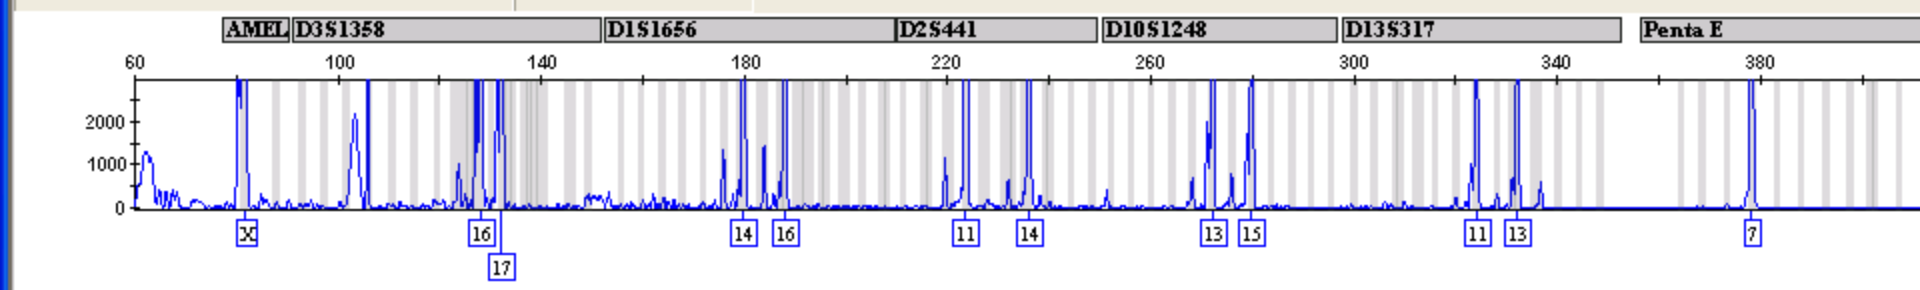

< [Progress bar]

D02\_2020 fsa PowerPlex\_Fusion\_POP7\_

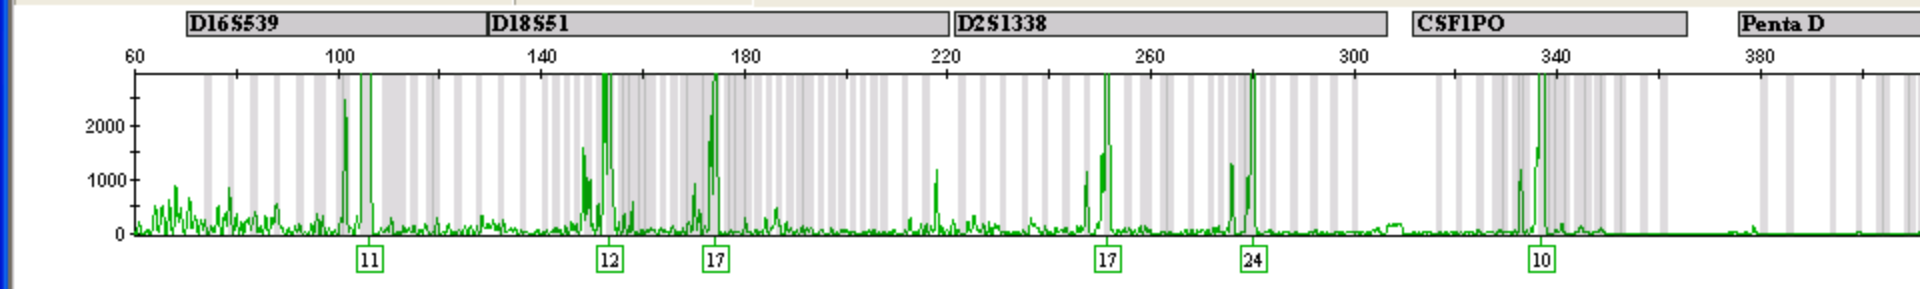

< [Progress bar]

D02\_2020 fsa PowerPlex\_Fusion\_POP7\_

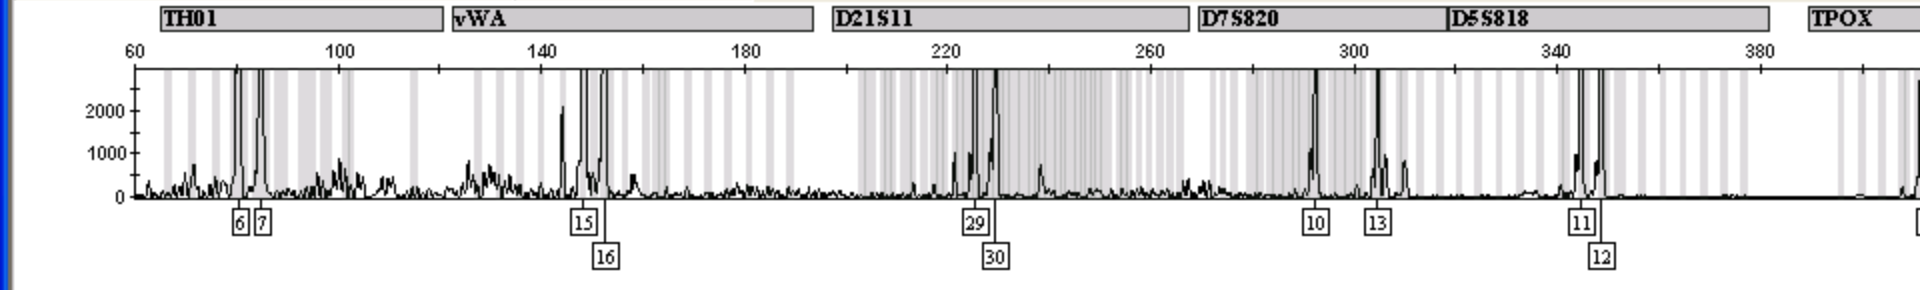

< [Progress bar]

D02\_2020 fsa PowerPlex\_Fusion\_POP7\_

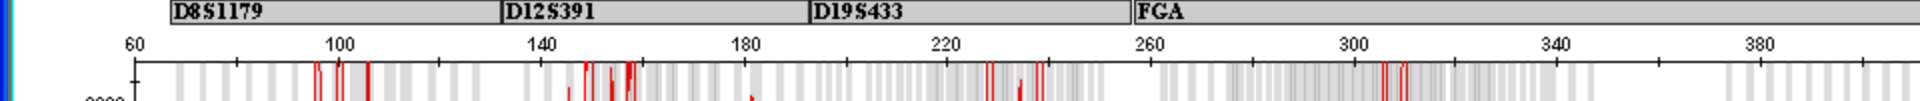

Sample File Panel

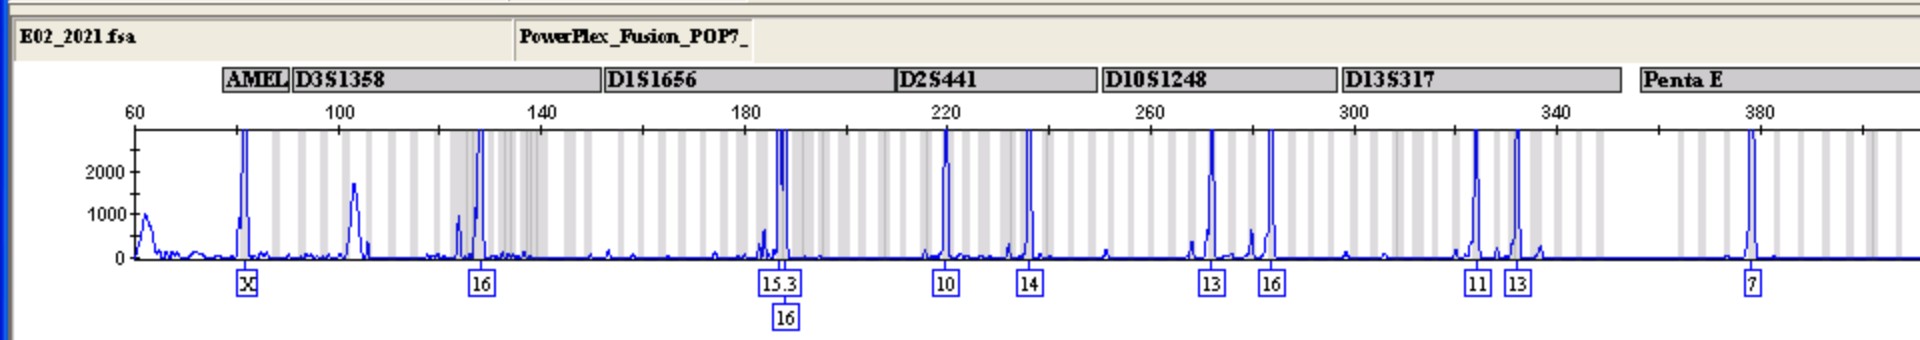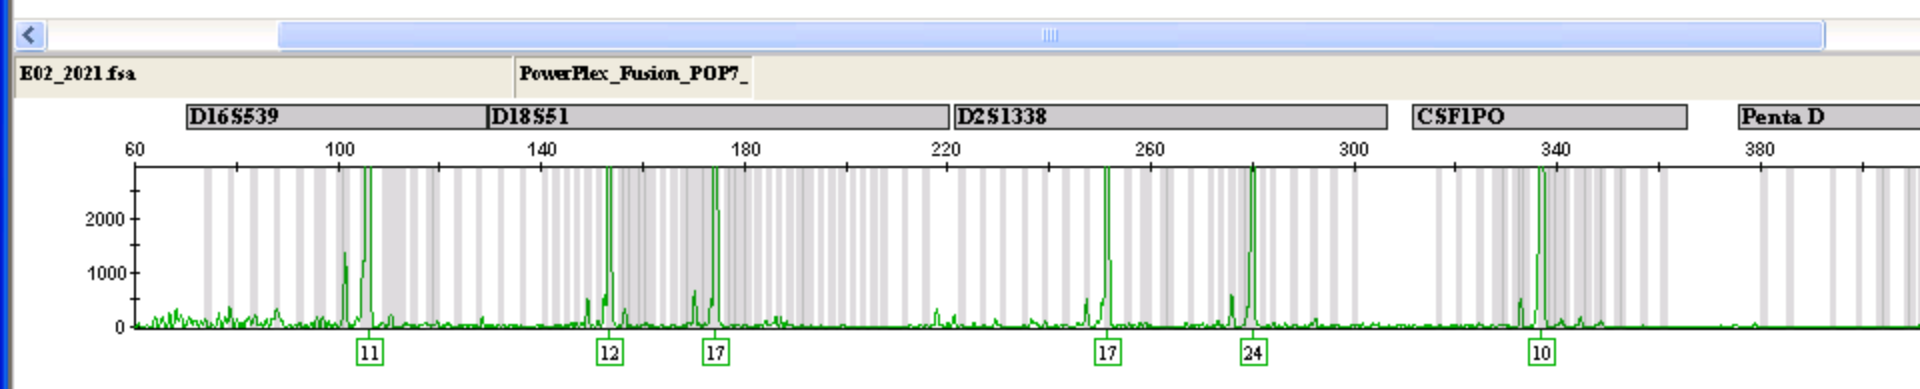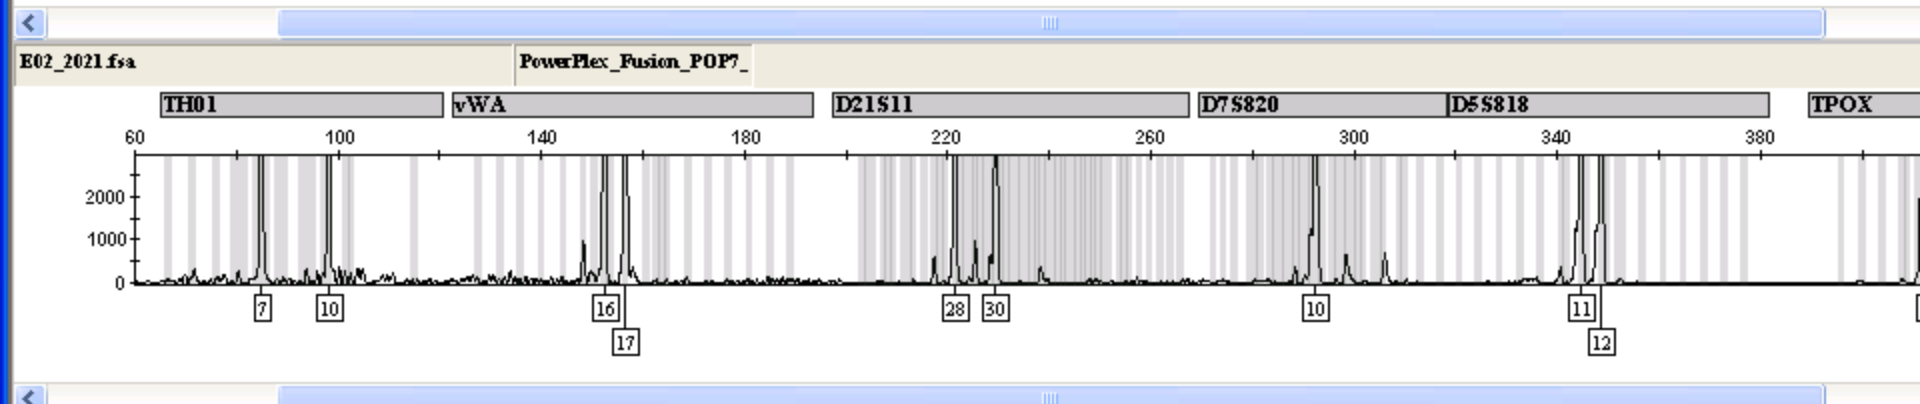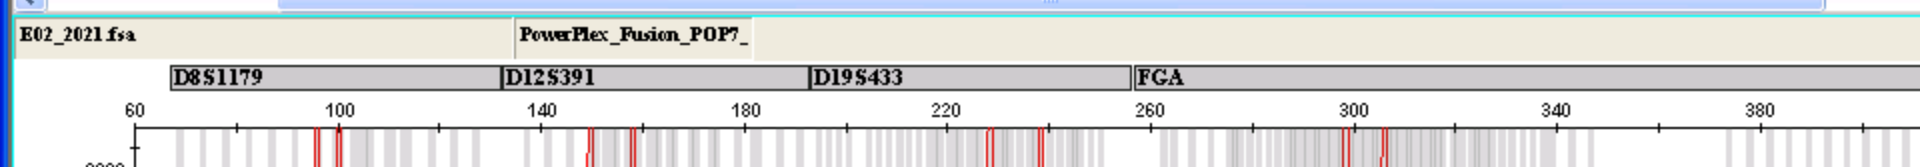

Sample File Panel

F02\_2022 fsa PowerPlex\_Fusion\_POP7\_

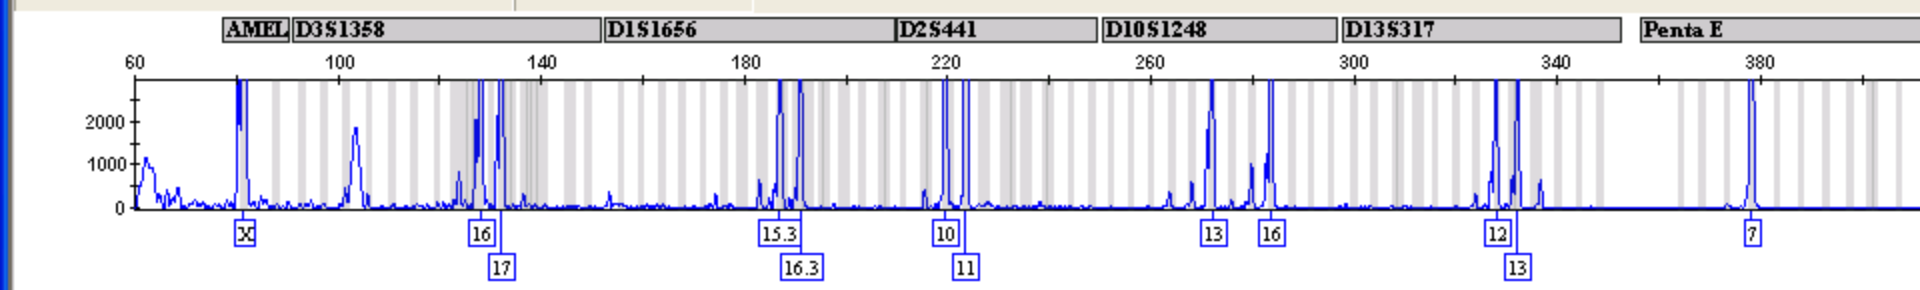

F02\_2022 fsa PowerPlex\_Fusion\_POP7\_

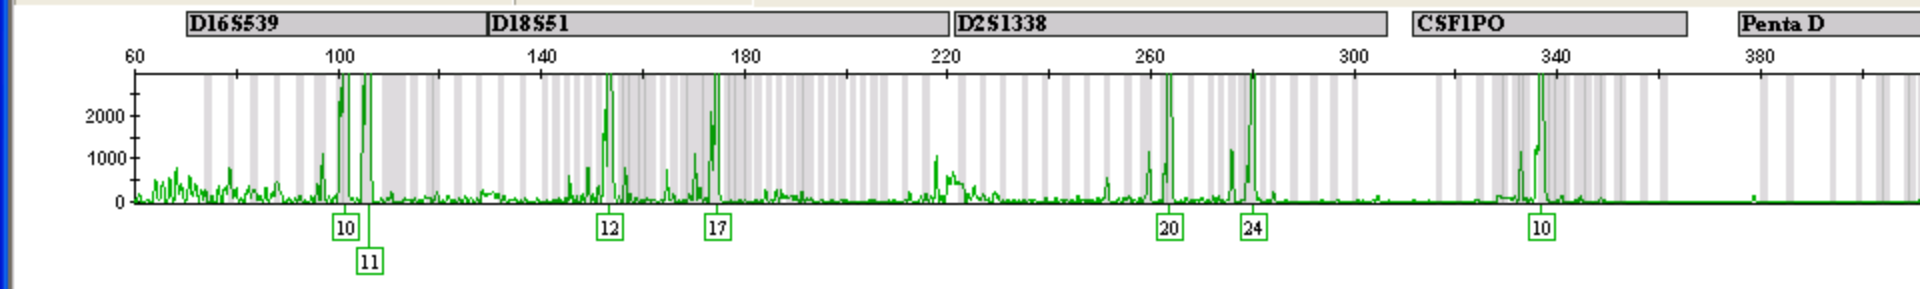

F02\_2022 fsa PowerPlex\_Fusion\_POP7\_

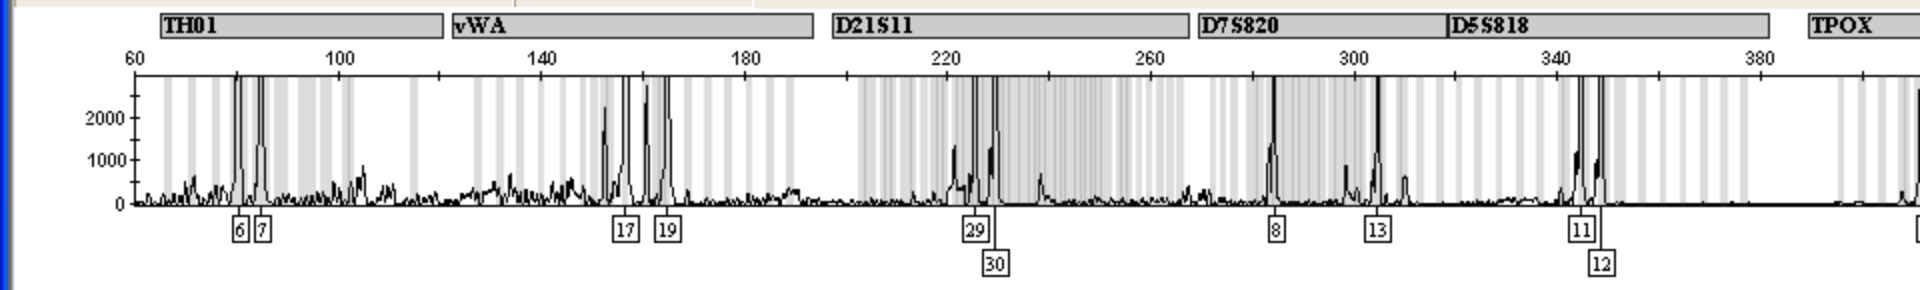

F02\_2022 fsa PowerPlex\_Fusion\_POP7\_

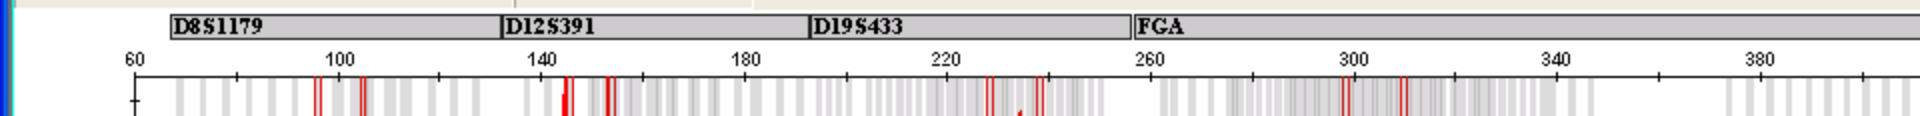

Sample File Panel

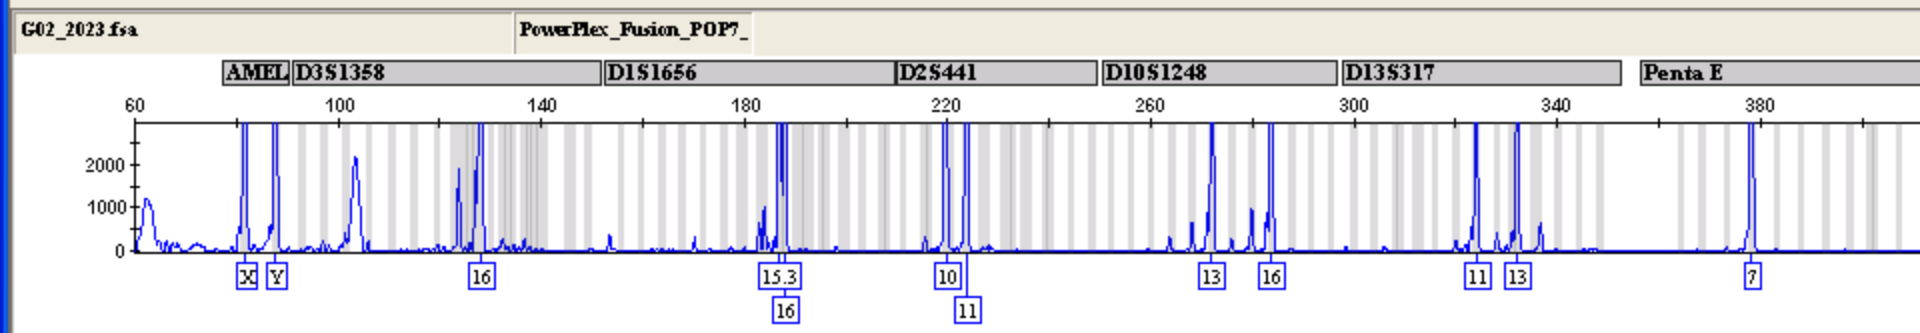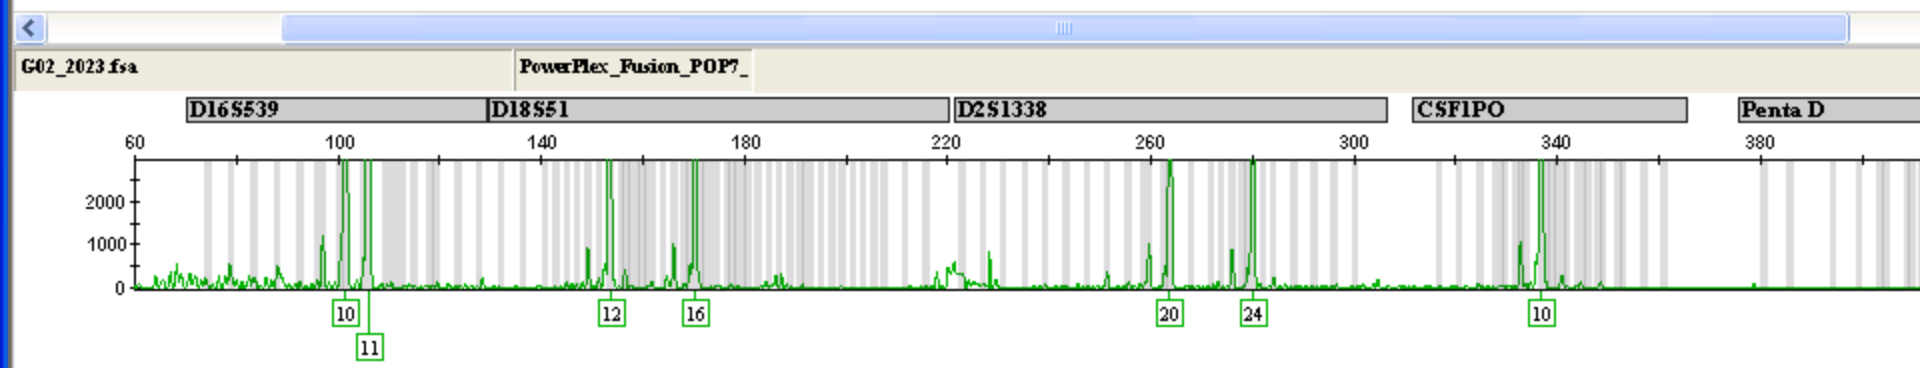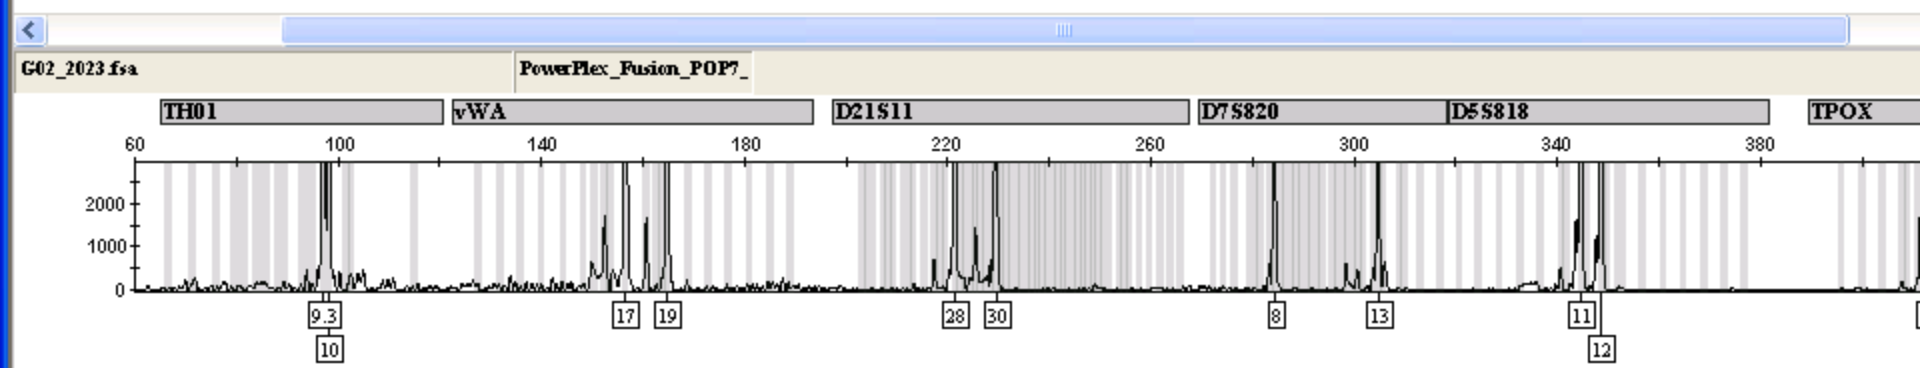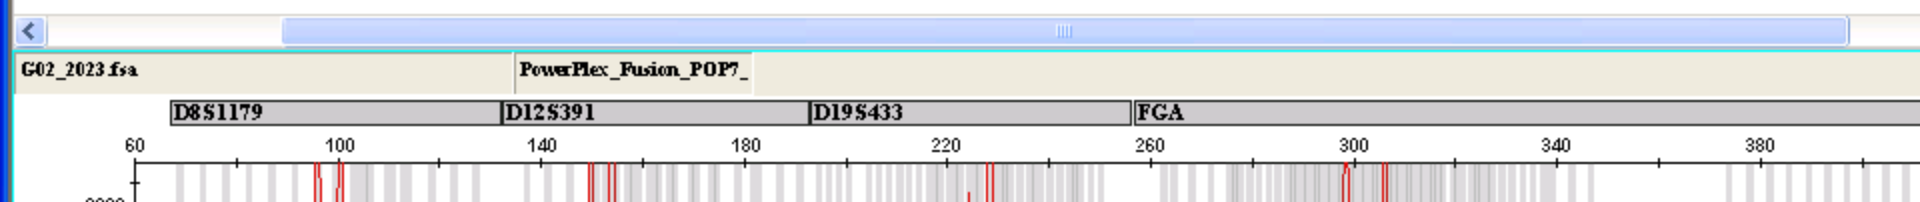

Sample File Panel

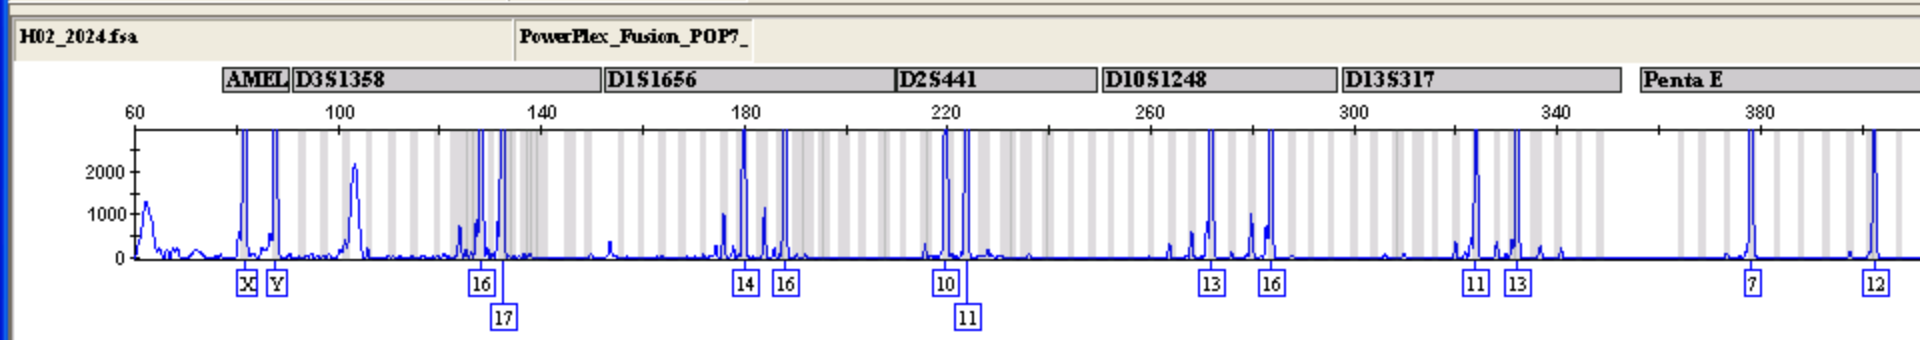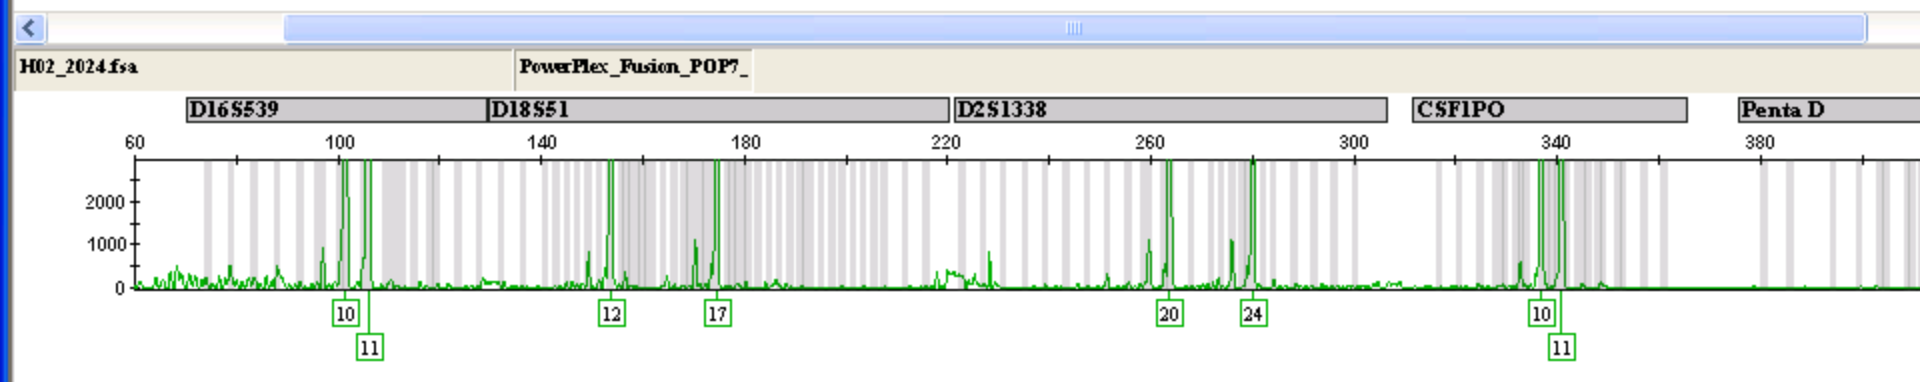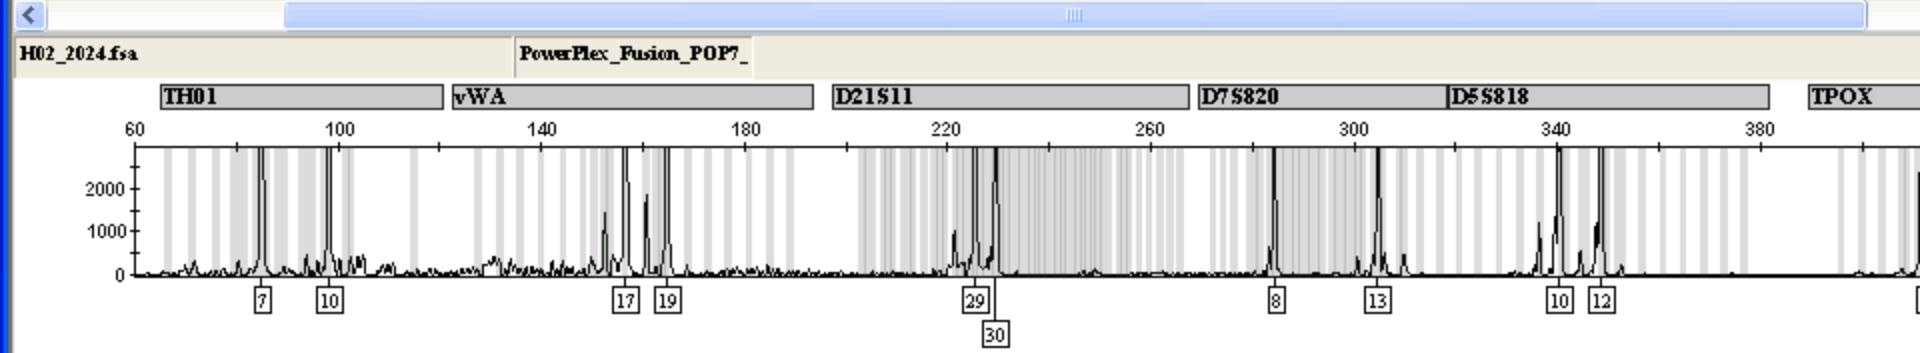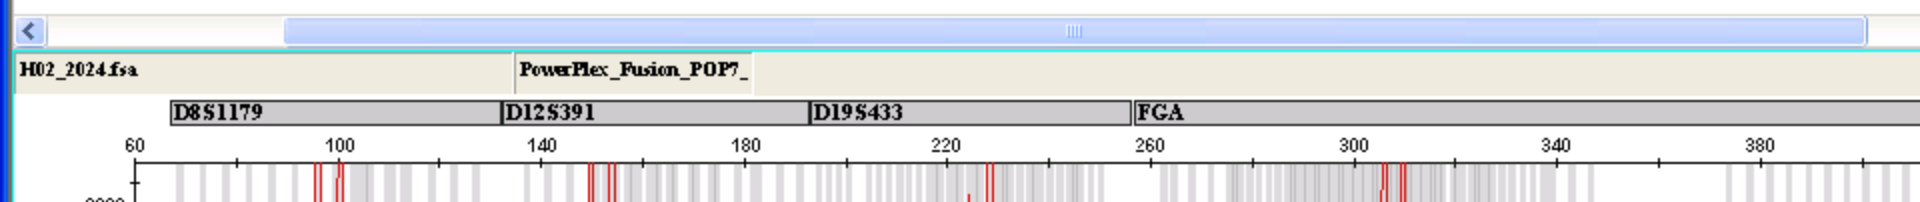

Sample File Panel

A03\_2025.fsa PowerPlex\_Fusion\_POP7\_

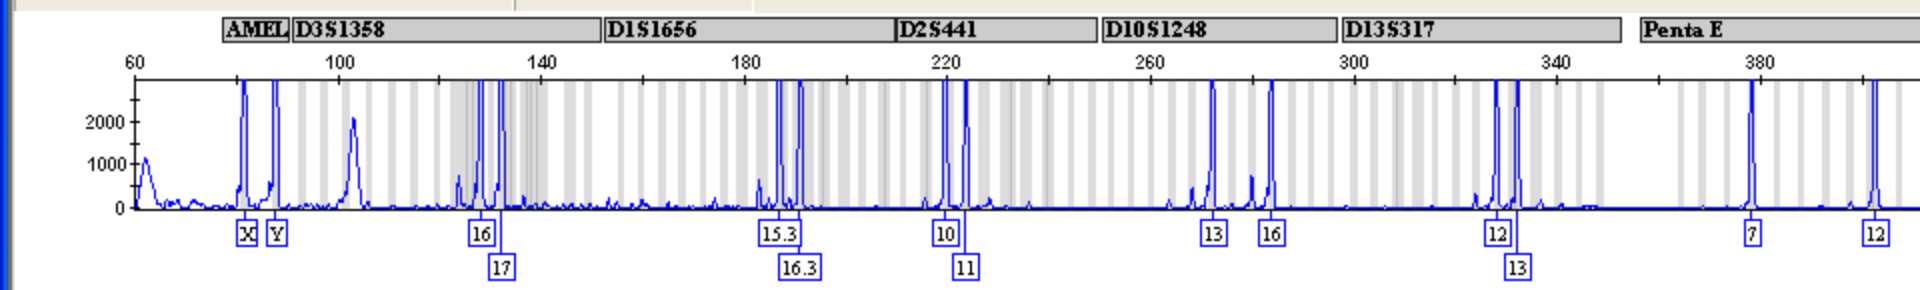

< |||

A03\_2025.fsa PowerPlex\_Fusion\_POP7\_

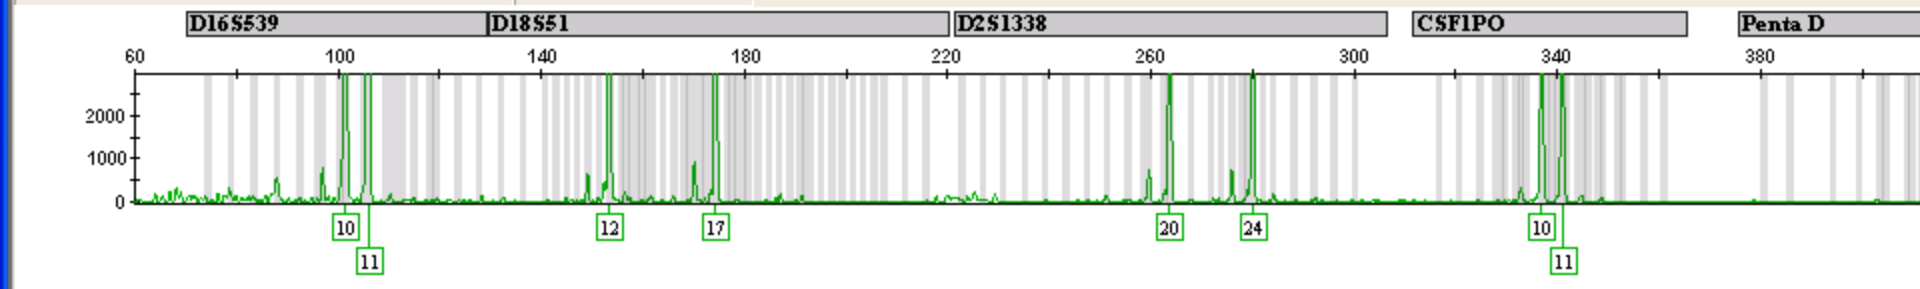

< |||

A03\_2025.fsa PowerPlex\_Fusion\_POP7\_

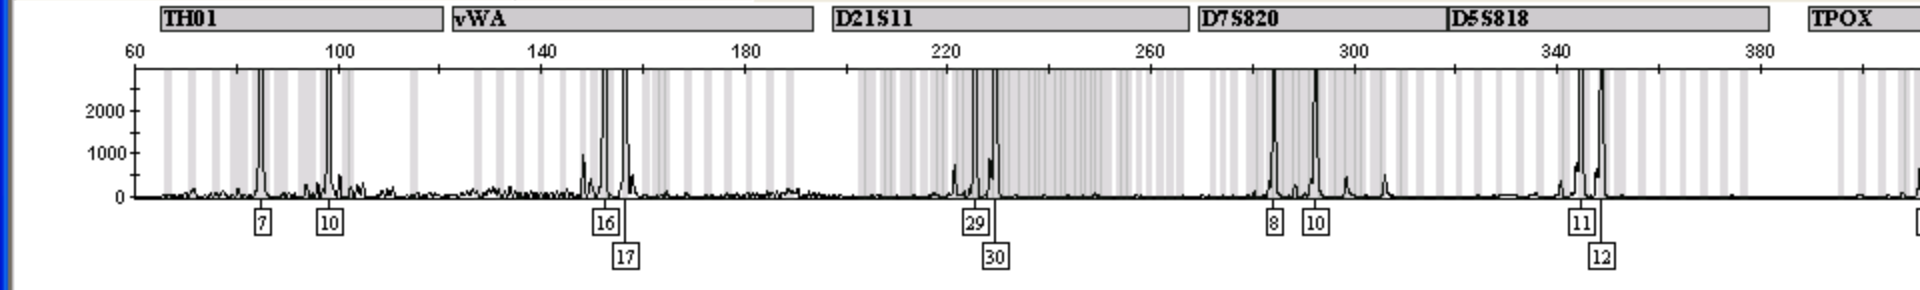

< |||

A03\_2025.fsa PowerPlex\_Fusion\_POP7\_

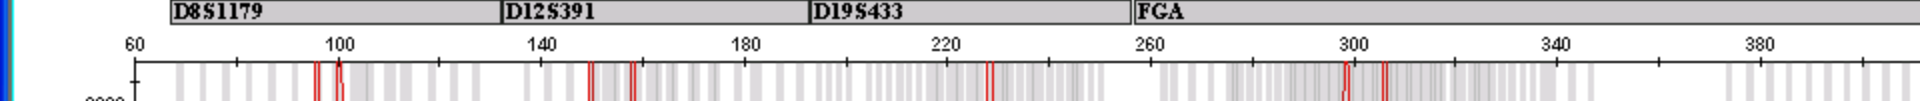



Sample File Panel

B03\_2026.fsa PowerPlex\_Fusion\_POP7\_

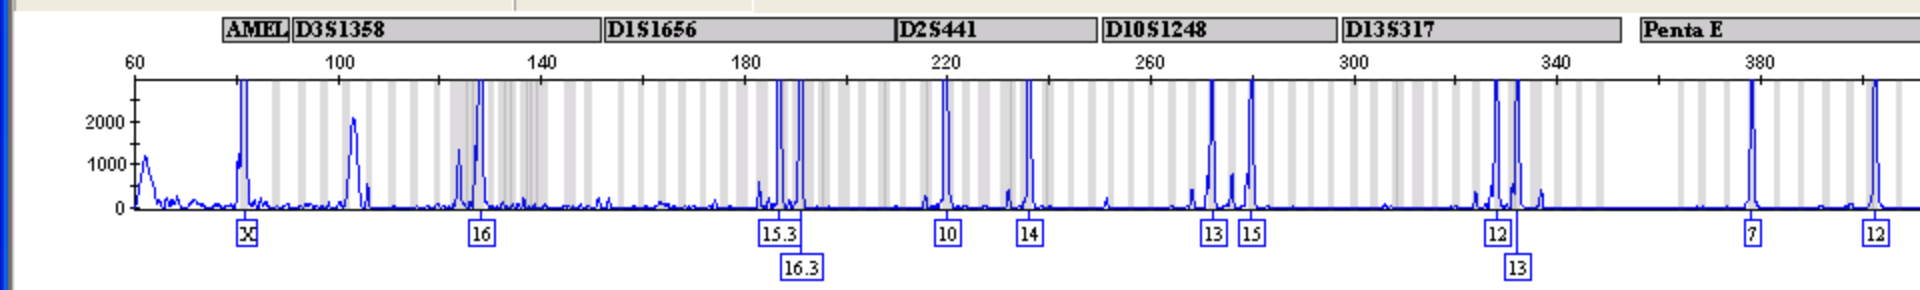

< [Progress bar]

B03\_2026.fsa PowerPlex\_Fusion\_POP7\_

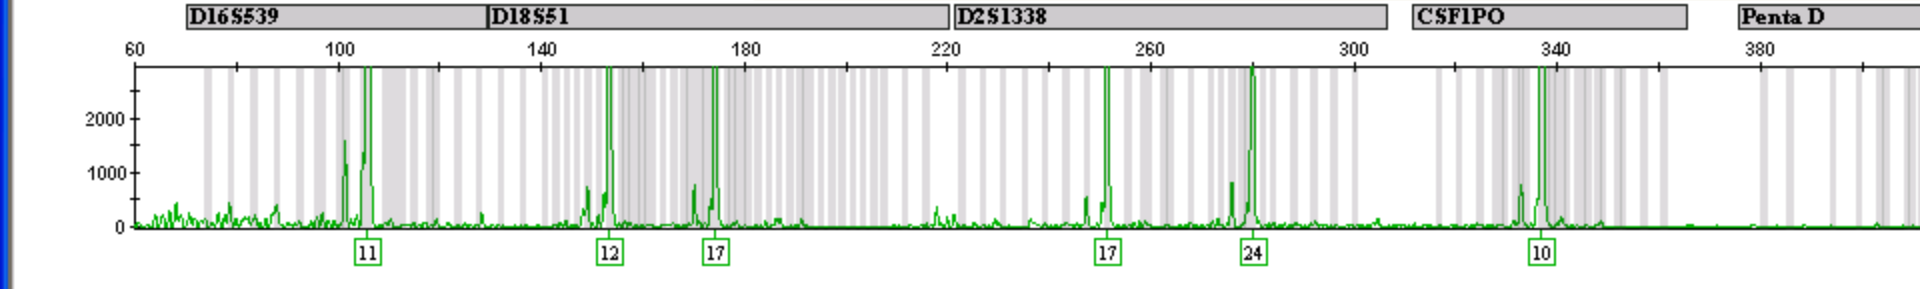

< [Progress bar]

B03\_2026.fsa PowerPlex\_Fusion\_POP7\_

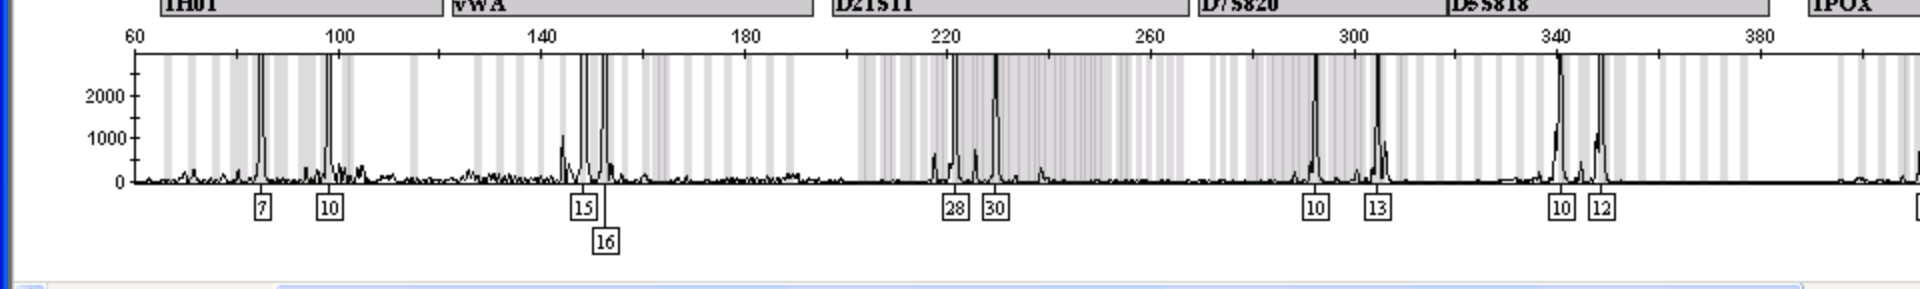

< [Progress bar]

B03\_2026.fsa PowerPlex\_Fusion\_POP7\_

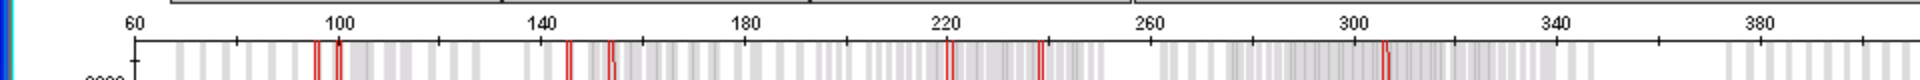

Sample File Panel

C03\_2027\_fsa PowerPlex\_Fusion\_POP7\_

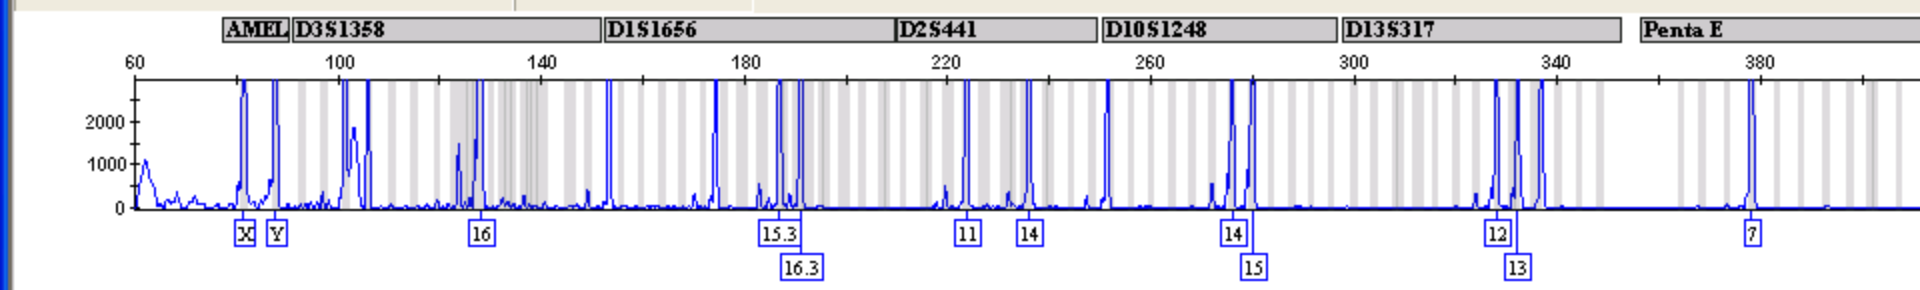

< [Progress bar]

C03\_2027\_fsa PowerPlex\_Fusion\_POP7\_

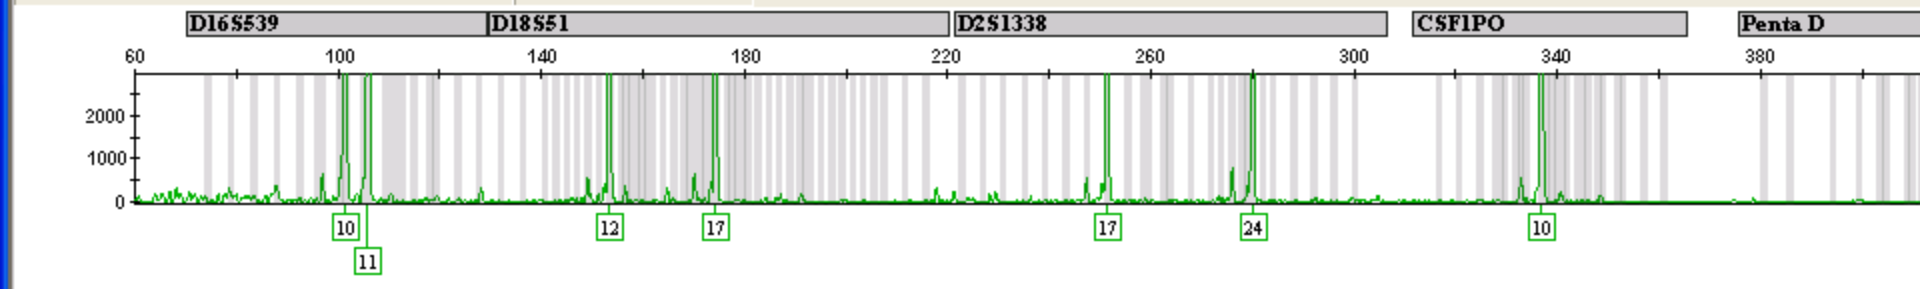

< [Progress bar]

C03\_2027\_fsa PowerPlex\_Fusion\_POP7\_

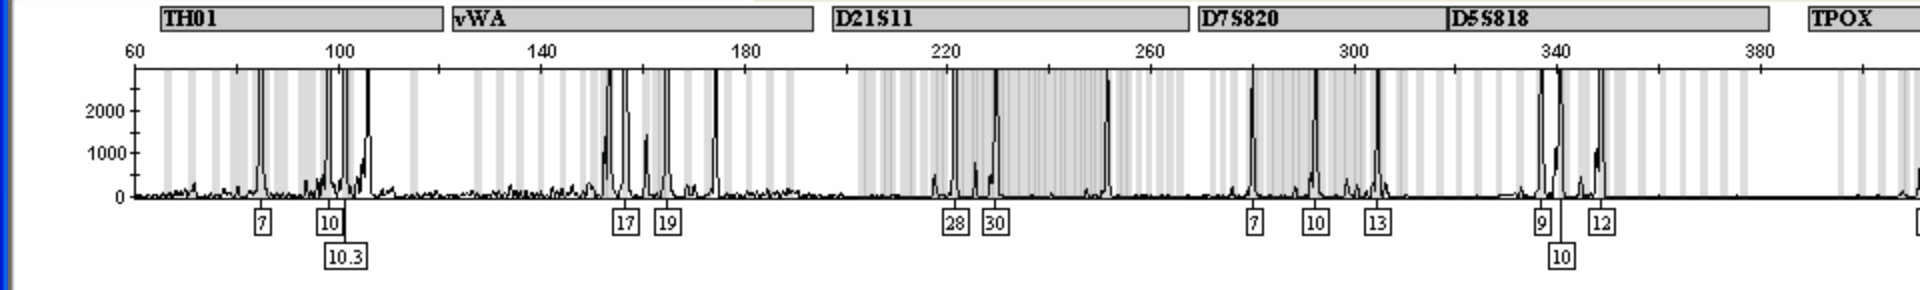

< [Progress bar]

C03\_2027\_fsa PowerPlex\_Fusion\_POP7\_

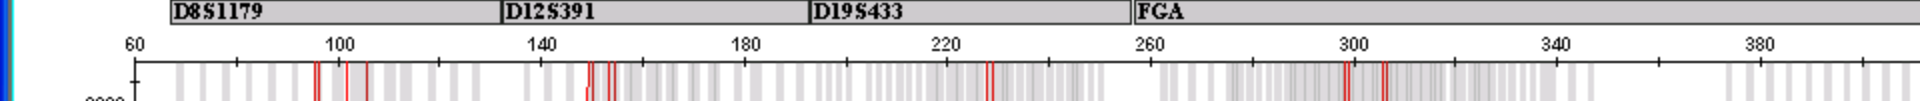

Sample File Panel

D03\_2028 fsa PowerPlex\_Fusion\_POP7\_

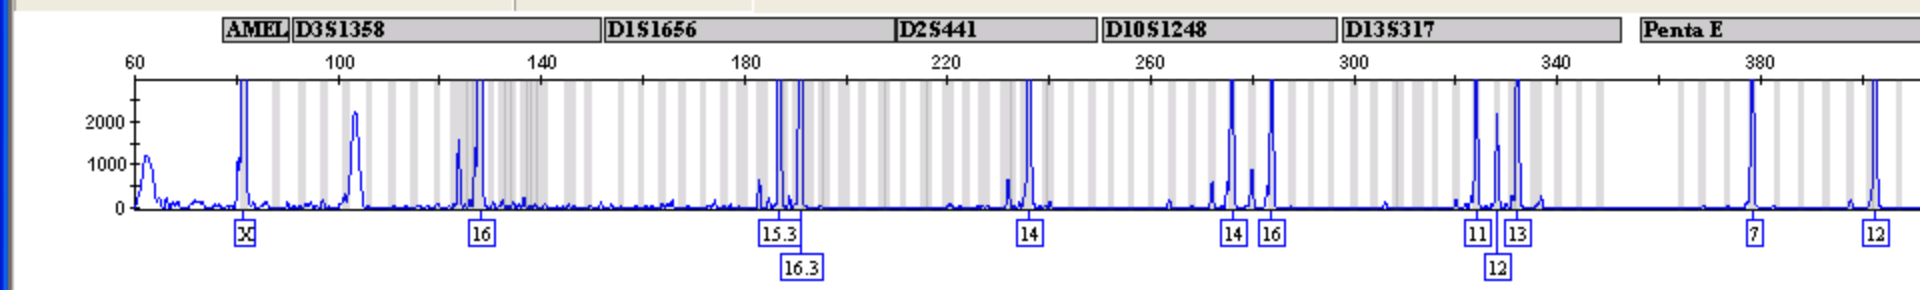

< [Progress bar]

D03\_2028 fsa PowerPlex\_Fusion\_POP7\_

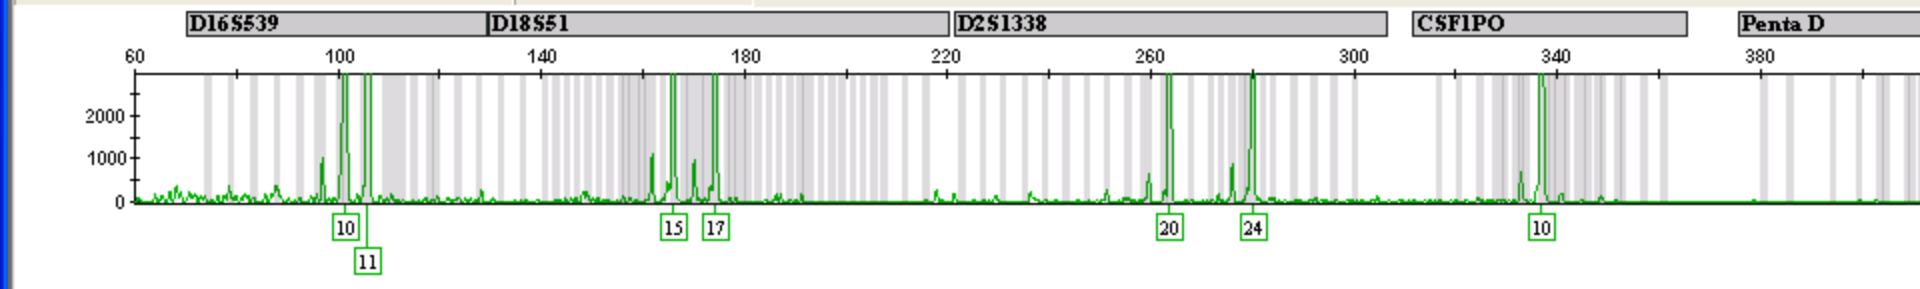

< [Progress bar]

D03\_2028 fsa PowerPlex\_Fusion\_POP7\_

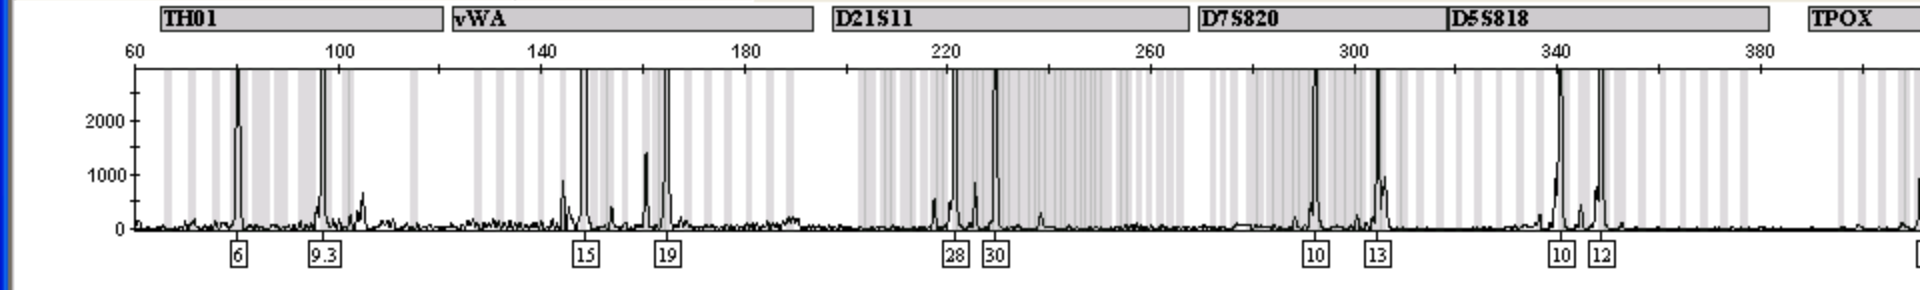

< [Progress bar]

D03\_2028 fsa PowerPlex\_Fusion\_POP7\_

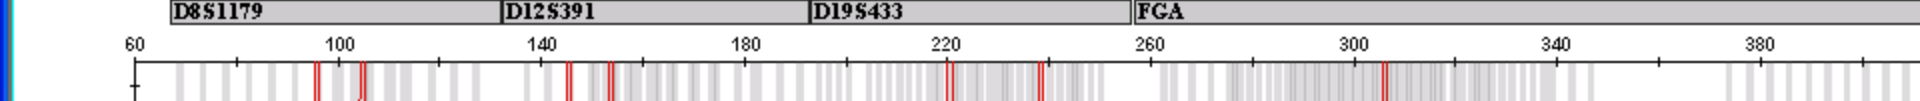

Sample File Panel

E03\_2029 fsa PowerPlex\_Fusion\_POP7\_

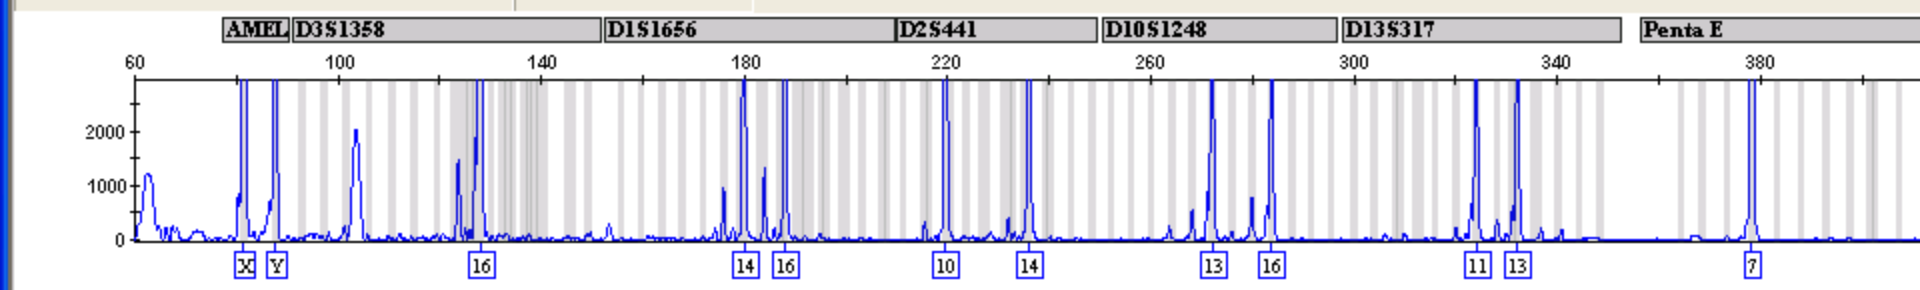

< [Progress bar]

E03\_2029 fsa PowerPlex\_Fusion\_POP7\_

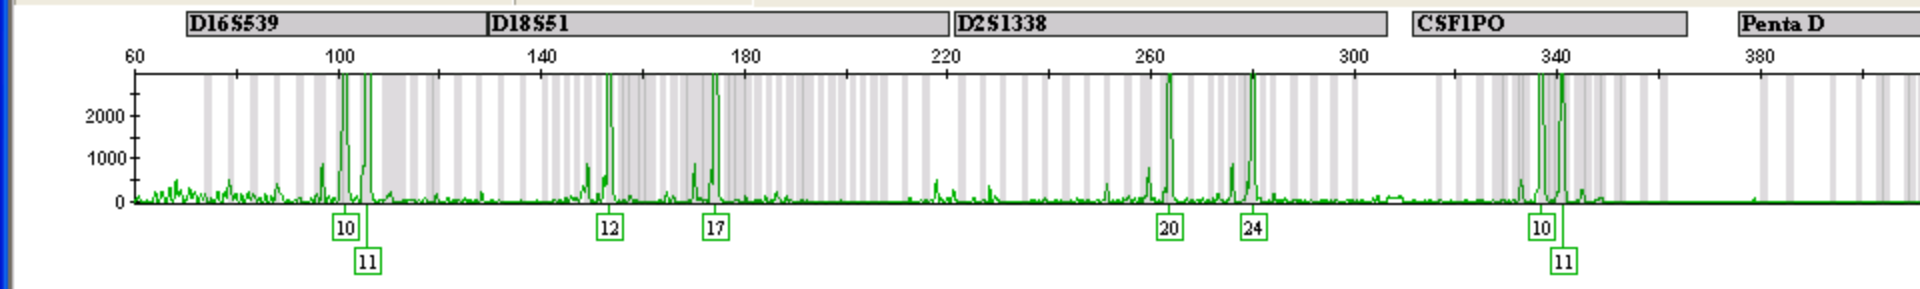

< [Progress bar]

E03\_2029 fsa PowerPlex\_Fusion\_POP7\_

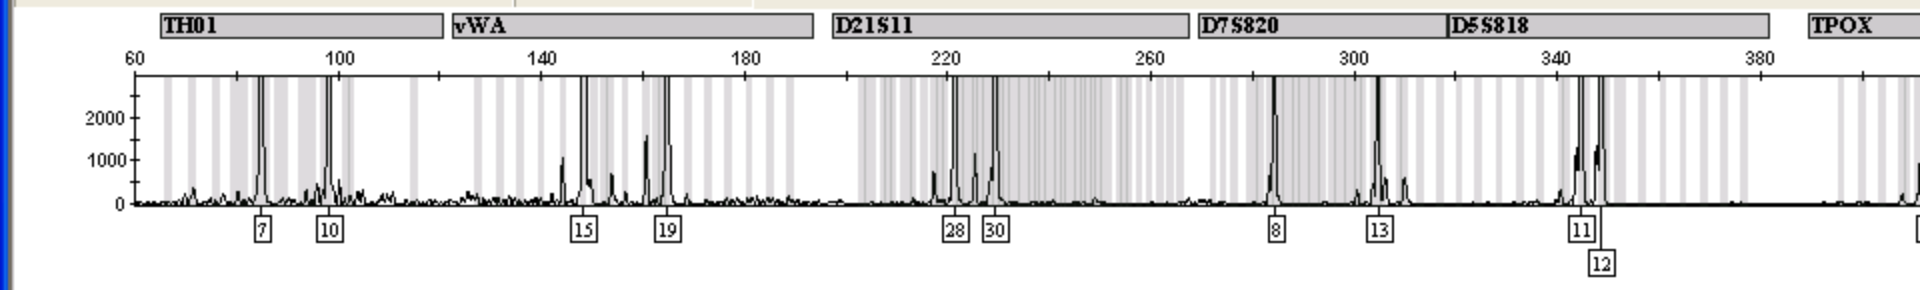

< [Progress bar]

E03\_2029 fsa PowerPlex\_Fusion\_POP7\_

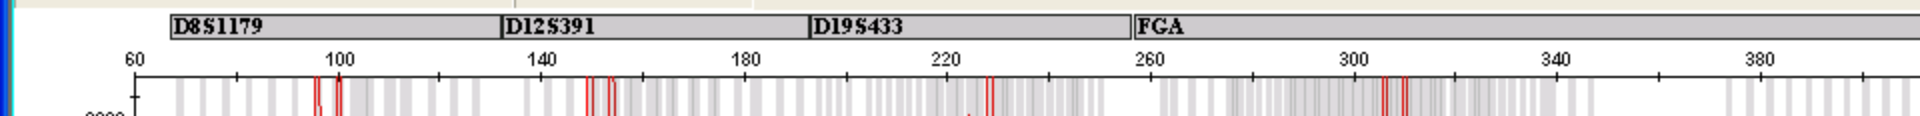

Sample File Panel

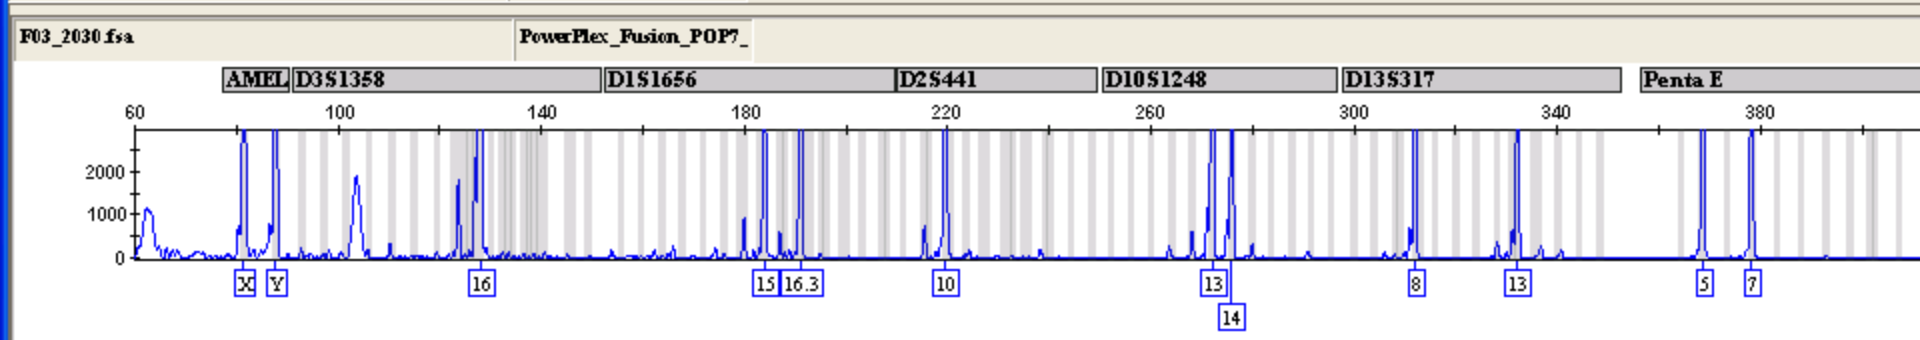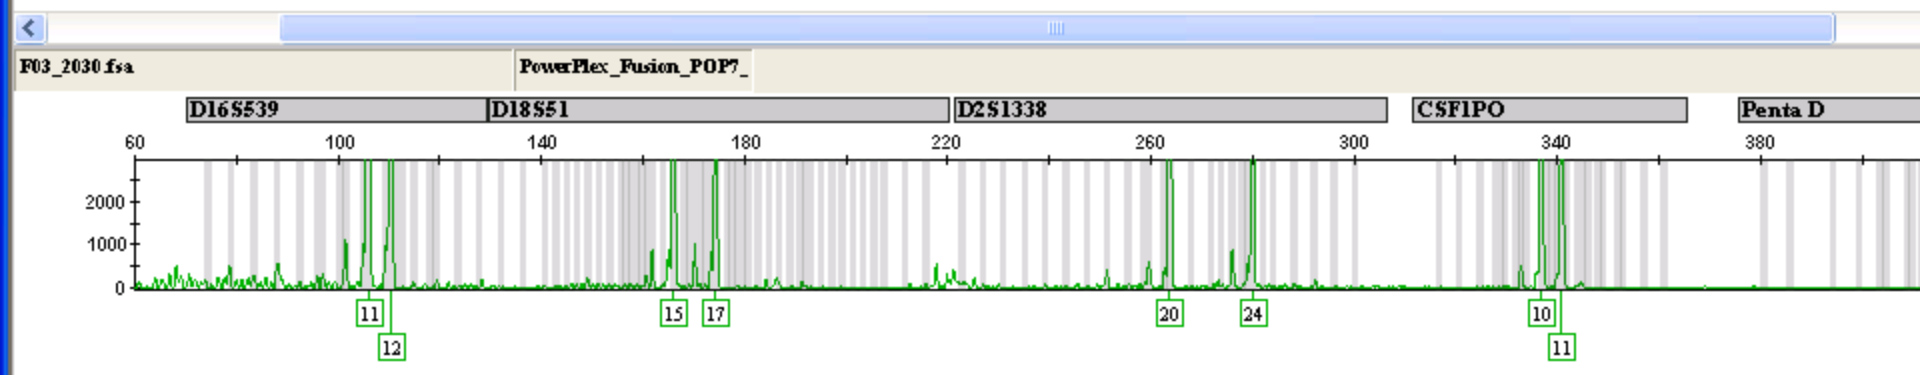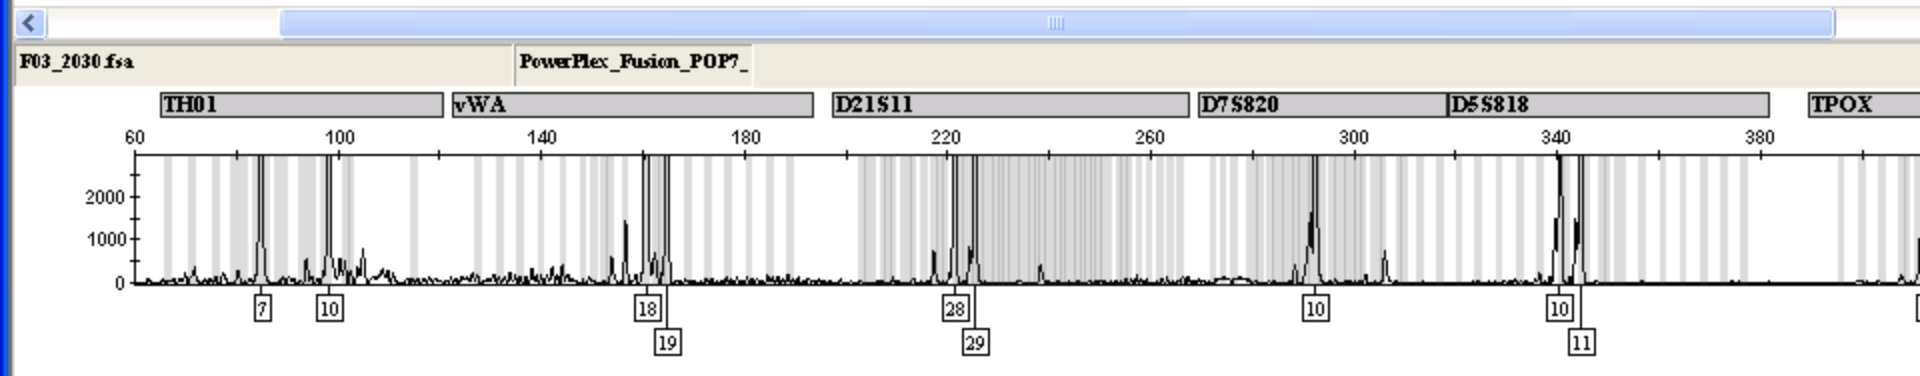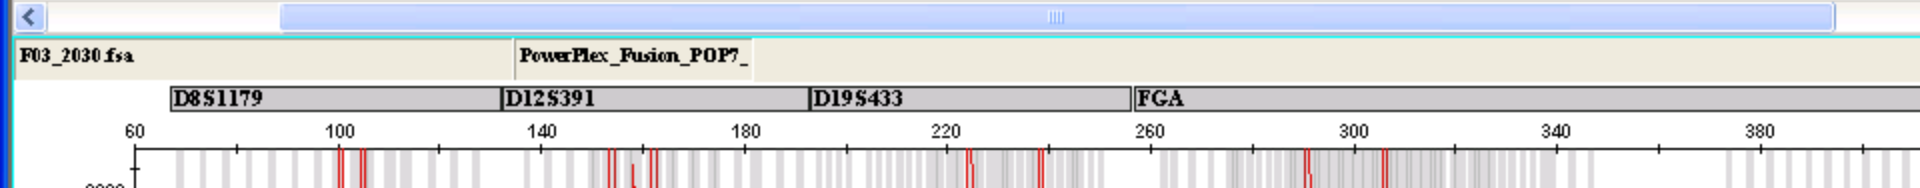

Sample File Panel

G03\_2031.fsa PowerPlex\_Fusion\_POP7\_

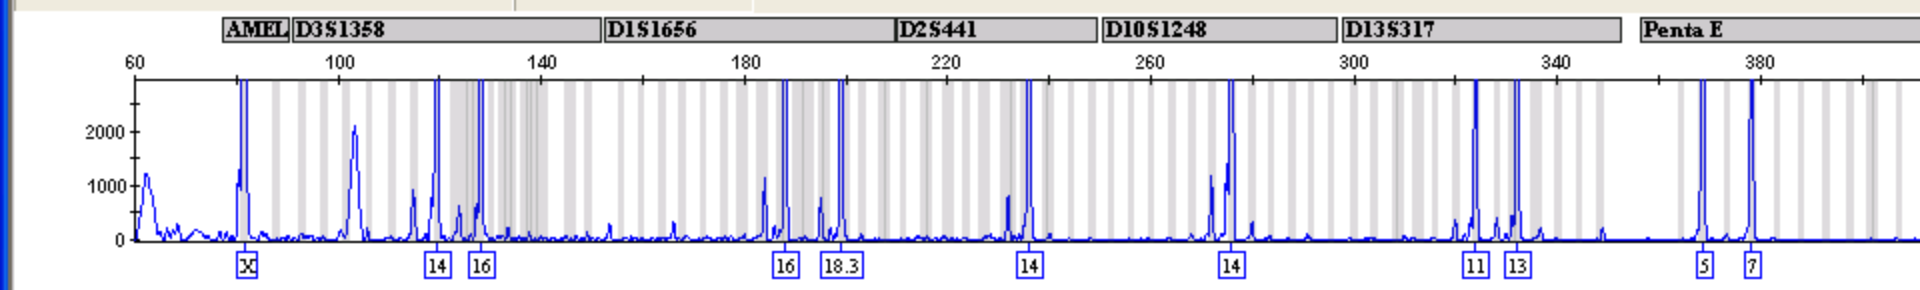

<

G03\_2031.fsa PowerPlex\_Fusion\_POP7\_

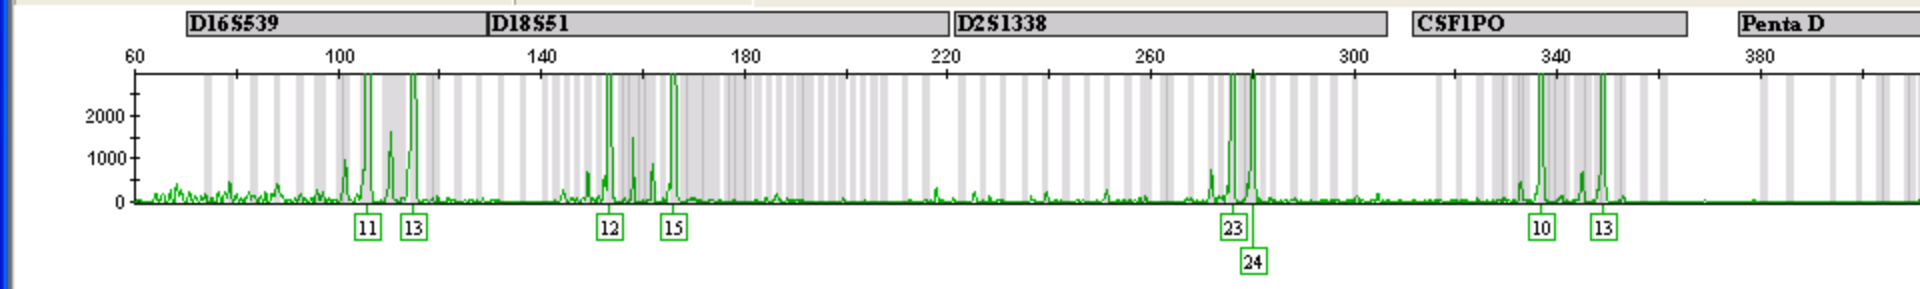

<

G03\_2031.fsa PowerPlex\_Fusion\_POP7\_

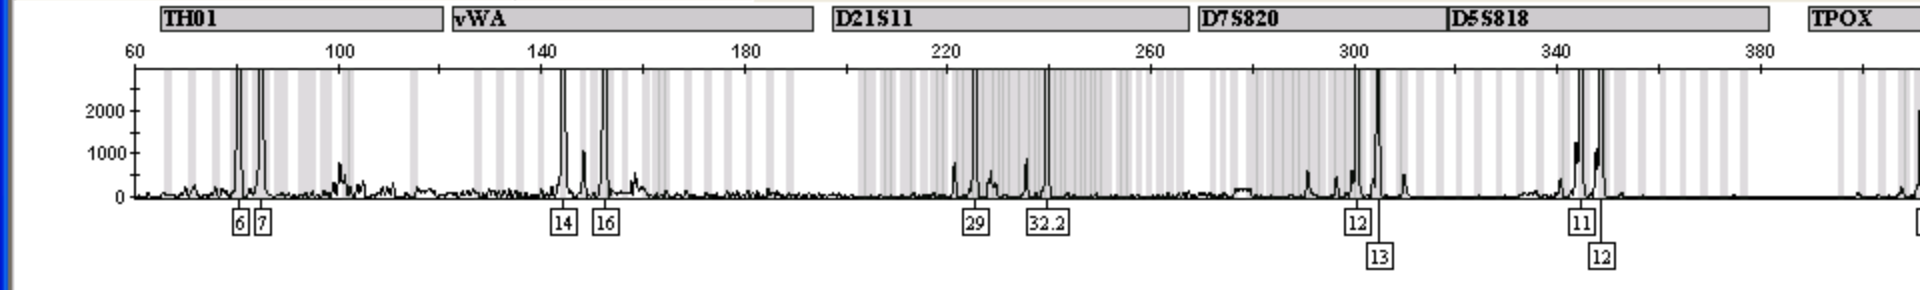

<

G03\_2031.fsa PowerPlex\_Fusion\_POP7\_

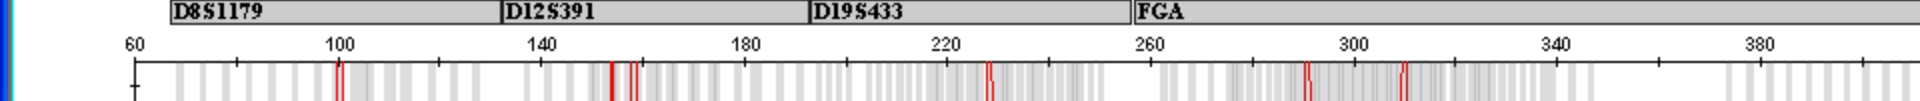

Sample File Panel

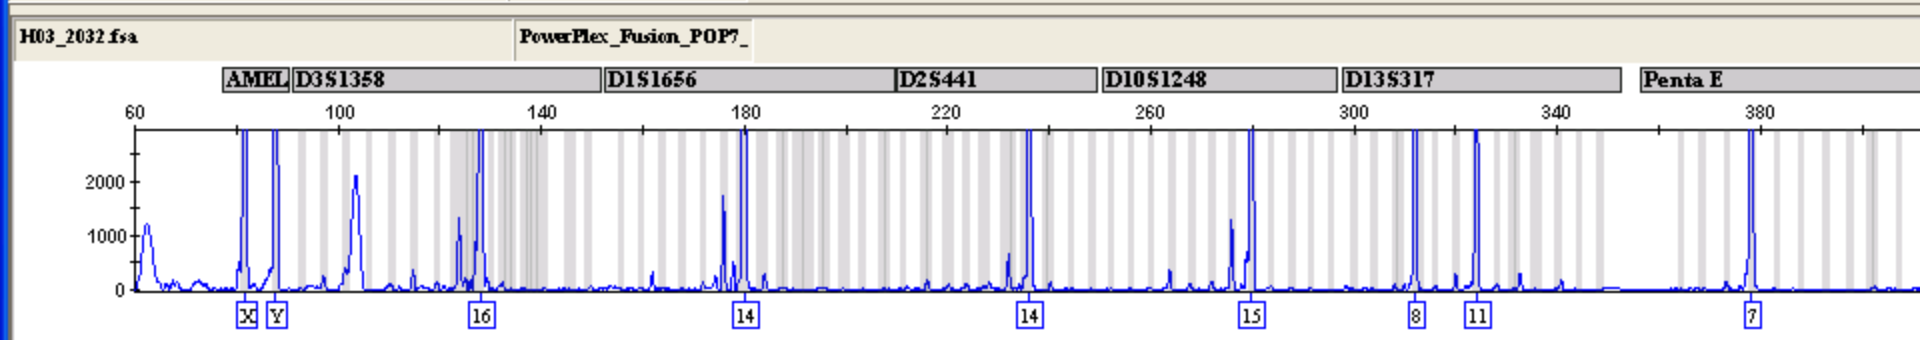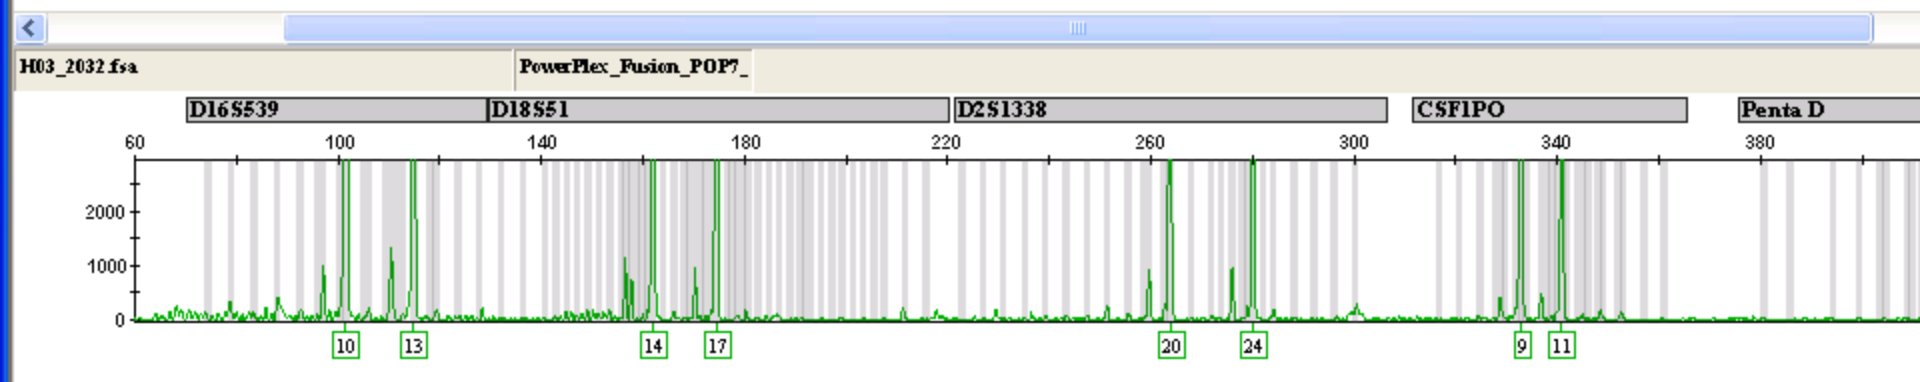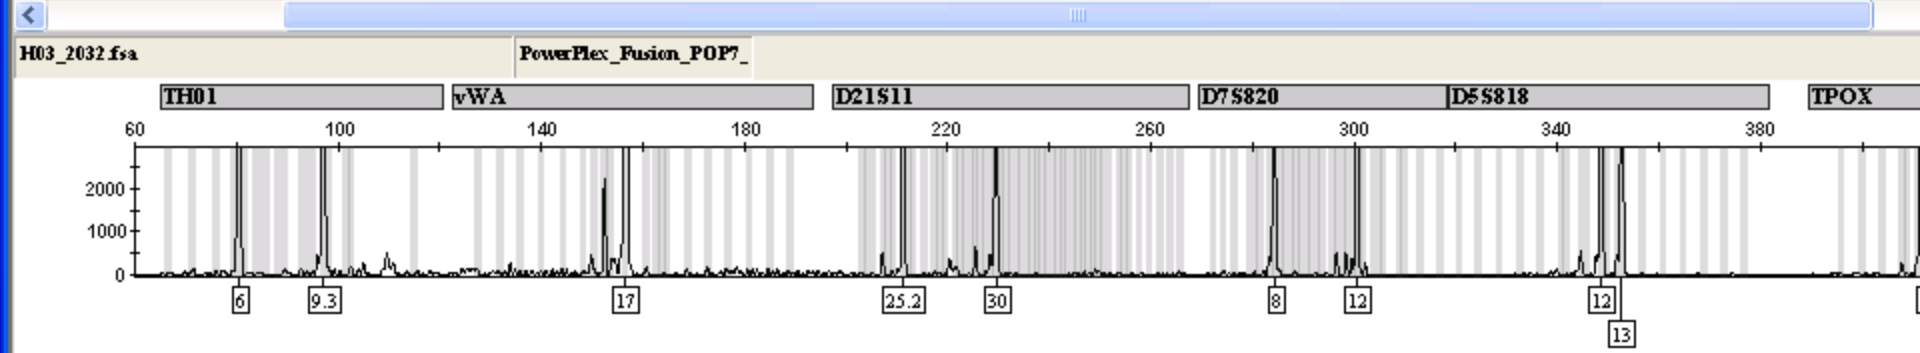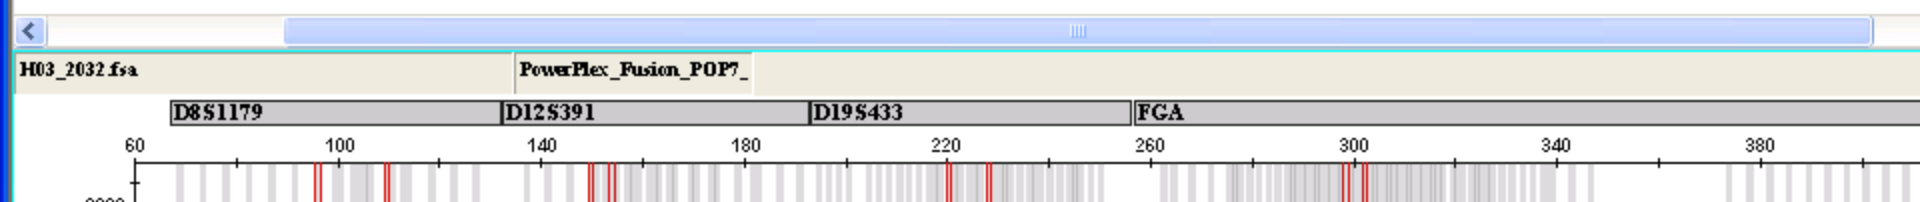

Sample File Panel

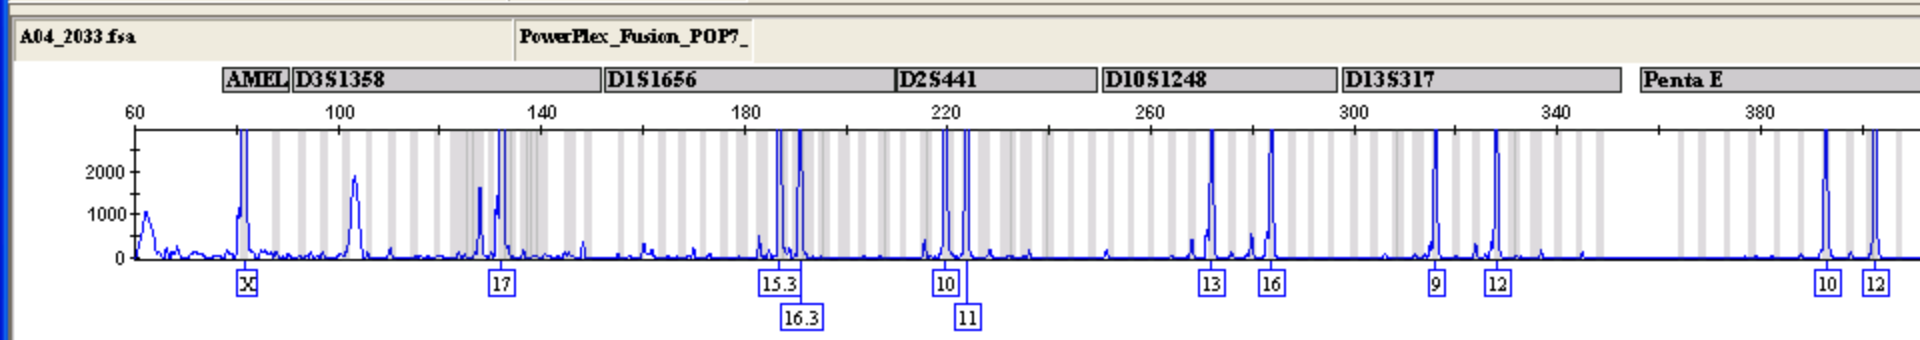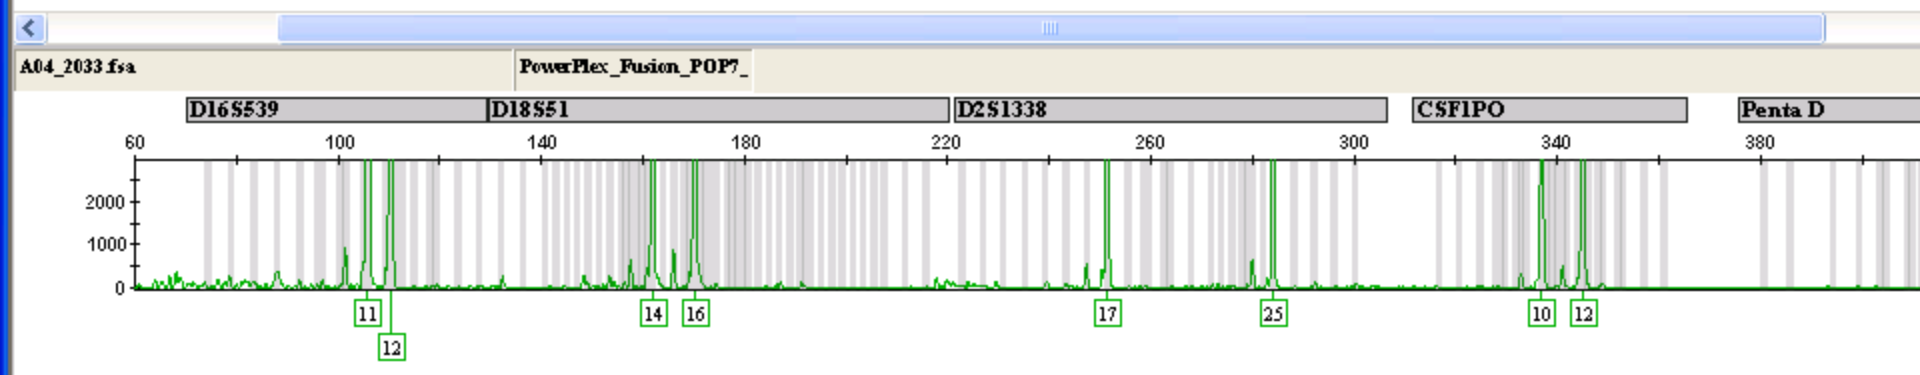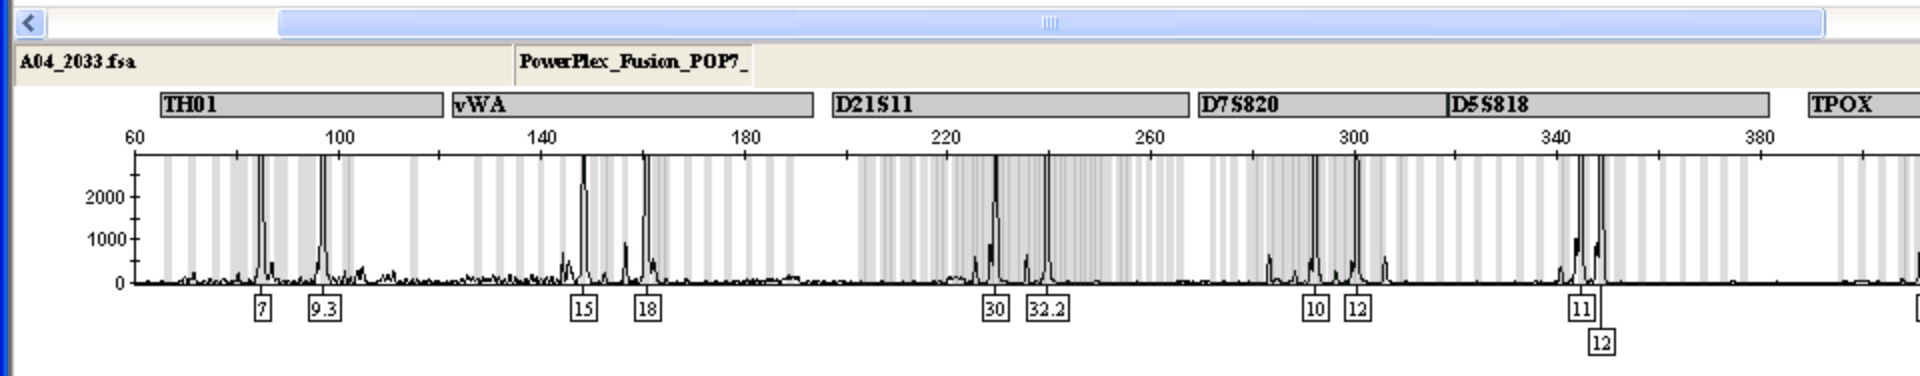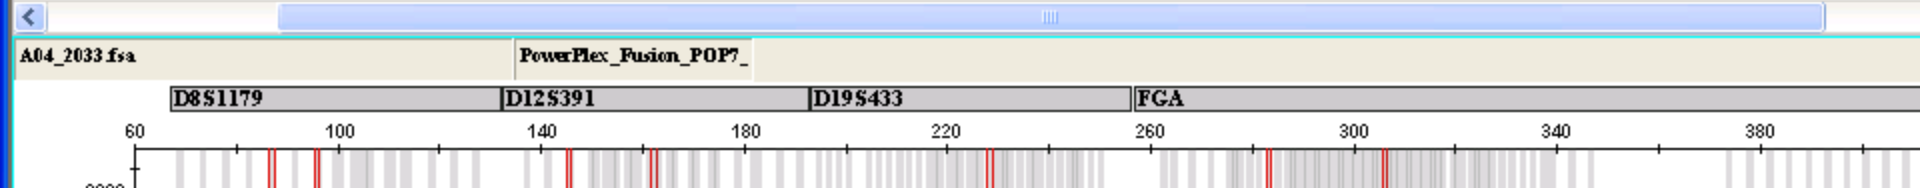



Sample File Panel

B04\_2034.fsa PowerPlex\_Fusion\_POP7\_

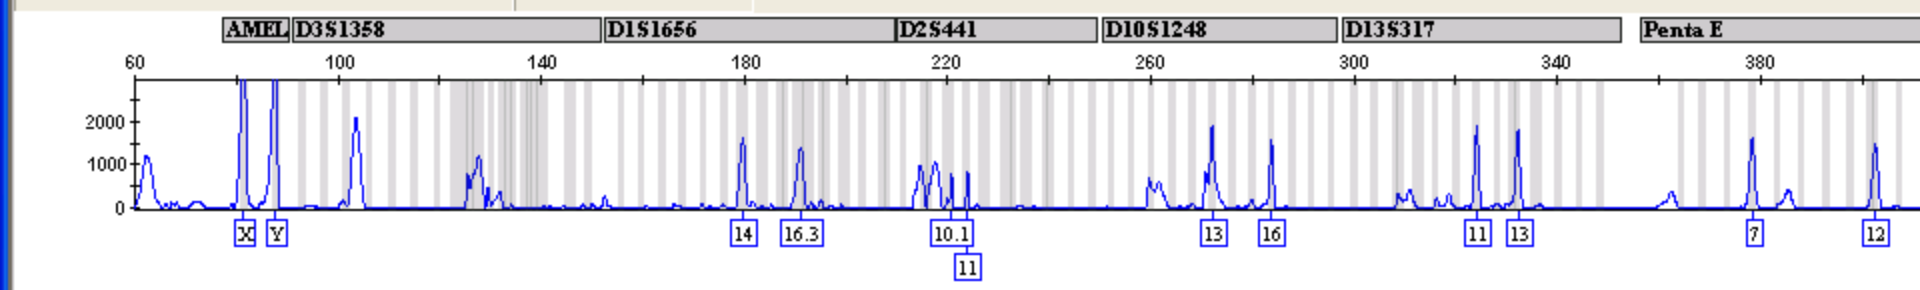

< [Progress bar]

B04\_2034.fsa PowerPlex\_Fusion\_POP7\_

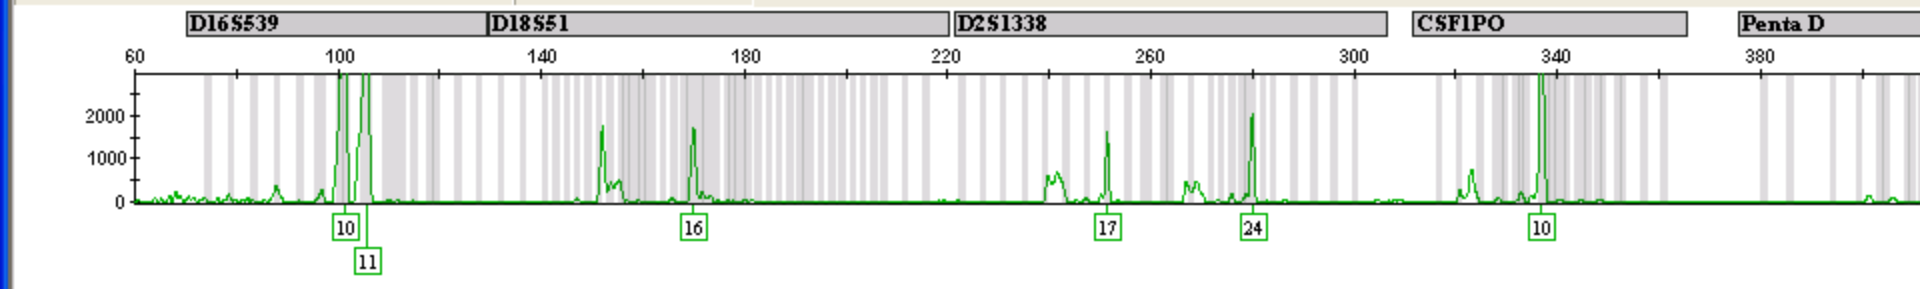

< [Progress bar]

B04\_2034.fsa PowerPlex\_Fusion\_POP7\_

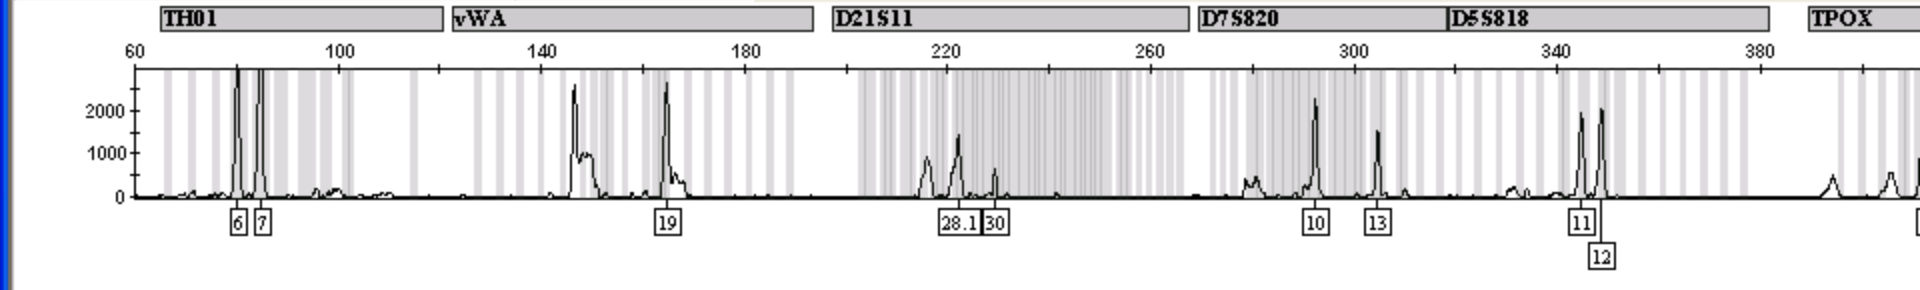

< [Progress bar]

B04\_2034.fsa PowerPlex\_Fusion\_POP7\_

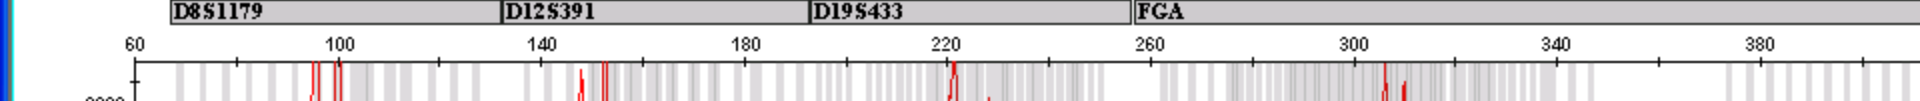

Supplement: NIHMS1635086-supplement-Suppl__File_6.pdf [file NIHMS1635086-supplement-Suppl__File_6.pdf]
