# Supplementary material
Source: PubMed Central journal article supplement (PMC7605509)

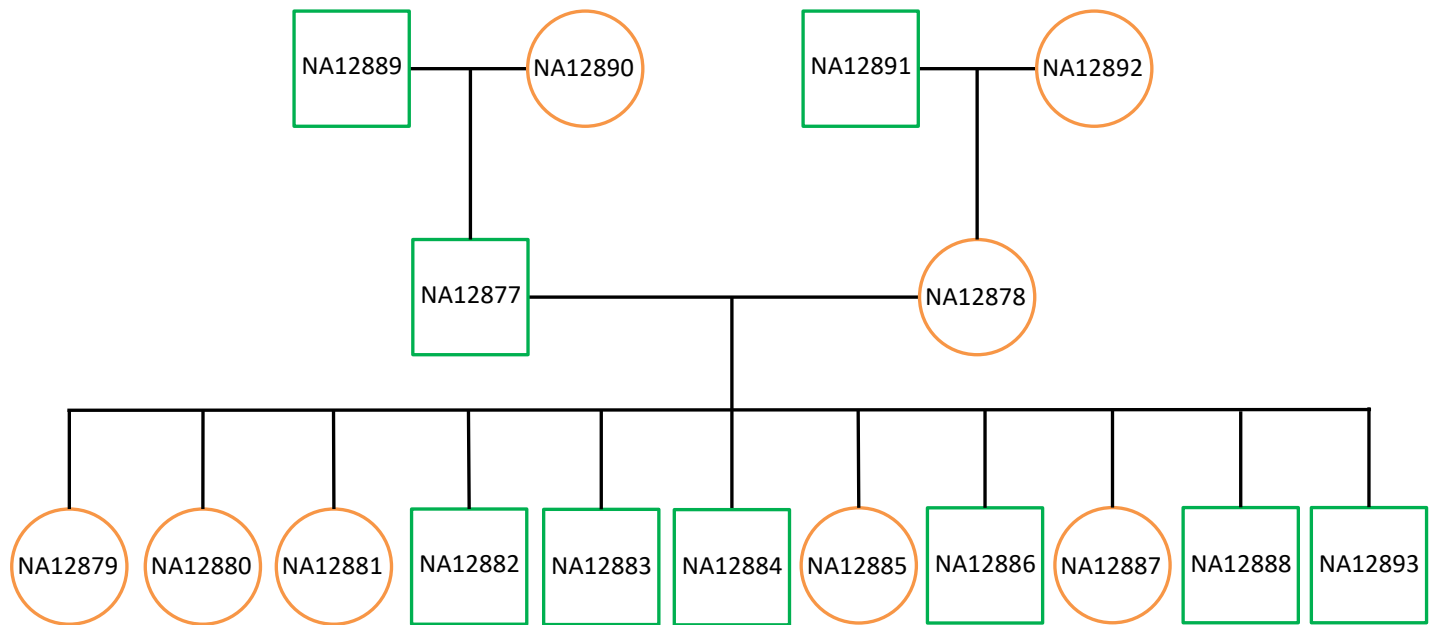

Supplement: NIHMS1635086-supplement-Suppl__File_2.pdf [file NIHMS1635086-supplement-Suppl__File_2.pdf]
